# Supplementary material for: Strain-level metagenomic profiling using pangenome graphs with PanTax
Source: Genome Res. 2026 Feb;36(2):405–20. doi: 10.1101/gr.280858.125 (PMC12863173; doi:10.1101/gr.280858.125)
Supplement: Supplement 6 [file Supplemental_Data.xlsx]

## Sheet: Supplementary Data
Metagenome dataset (Low complexity)									Metagenome dataset (High complexity)
Low complexity	SpeciesNames	mANI		SpeciesNames	StrainNumber				High complexity	SpeciesNames	mANI		SpeciesNames	StrainNumber
GCF_000183285.1_ASM18328v1_genomic.fna	Buchnera aphidicola str. Tuc7 (Acyrthosiphon pisum)	99.7942		Buchnera aphidicola str. Tuc7 (Acyrthosiphon pisum)	2				GCF_006402735.1_ASM640273v1_genomic.fna	Myxococcus xanthus	99.2234		Clostridium perfringens	5
GCF_000021065.1_ASM2106v1_genomic.fna	Buchnera aphidicola str. Tuc7 (Acyrthosiphon pisum)	99.7942		Shewanella putrefaciens	2				GCF_006400955.1_ASM640095v1_genomic.fna	Myxococcus xanthus	99.2234		Staphylococcus aureus	5
GCF_025402875.1_ASM2540287v1_genomic.fna	Shewanella putrefaciens	98.638		Brucella abortus	2				GCF_006401635.1_ASM640163v1_genomic.fna	Myxococcus xanthus	99.2234		Rhodococcus erythropolis	5
GCF_016406325.1_ASM1640632v1_genomic.fna	Shewanella putrefaciens	98.638		Helicobacter cinaedi	2				GCF_002305895.1_ASM230589v1_genomic.fna	Corallococcus macrosporus	98.5373		Rhodopseudomonas palustris	5
GCF_006400955.1_ASM640095v1_genomic.fna	Myxococcus xanthus	99.2619		Helicobacter pylori SJM180	2				GCF_000219105.1_ASM21910v1_genomic.fna	Corallococcus macrosporus	98.5373		Bifidobacterium catenulatum	5
GCF_006401215.1_ASM640121v1_genomic.fna	Myxococcus xanthus	99.2619		Campylobacter sputorum	2				GCF_000418325.1_ASM41832v1_genomic.fna	Sorangium cellulosum	95.4504		Leuconostoc mesenteroides	5
GCF_000219105.1_ASM21910v1_genomic.fna	Corallococcus macrosporus	98.5373		Campylobacter mucosalis	2				GCF_004135755.1_ASM413575v1_genomic.fna	Sorangium cellulosum	95.4504		Ralstonia solanacearum	5
GCF_002305895.1_ASM230589v1_genomic.fna	Corallococcus macrosporus	98.5373		Campylobacter lari	2				GCF_005954665.1_ASM595466v1_genomic.fna	Lysobacter enzymogenes	98.1659		Xanthomonas translucens pv. secalis	5
GCF_000418325.1_ASM41832v1_genomic.fna	Sorangium cellulosum	95.4504		Campylobacter curvus	2				GCF_023617245.1_ASM2361724v1_genomic.fna	Lysobacter enzymogenes	98.2198		Xanthomonas citri	5
GCF_004135755.1_ASM413575v1_genomic.fna	Sorangium cellulosum	95.4504		Campylobacter concisus	2				GCF_002024615.2_ASM202461v2_genomic.fna	Lysobacter enzymogenes	98.2198		Lactobacillus gasseri	5
GCF_005954665.1_ASM595466v1_genomic.fna	Lysobacter enzymogenes	98.1286		Campylobacter jejuni	2				GCF_007747015.1_ASM774701v1_genomic.fna	Gimesia maris	98.4056		Serratia marcescens	5
GCF_023617245.1_ASM2361724v1_genomic.fna	Lysobacter enzymogenes	98.1286		Campylobacter fetus subsp. fetus	2				GCF_009720545.1_ASM972054v1_genomic.fna	Gimesia maris	98.4056		Staphylococcus carnosus	5
GCF_009720545.1_ASM972054v1_genomic.fna	Gimesia maris	98.4056		Campylobacter coli	2				GCF_002151485.1_ASM215148v1_genomic.fna	Borreliella burgdorferi	99.389		Streptomyces albidoflavus	5
GCF_007747015.1_ASM774701v1_genomic.fna	Gimesia maris	98.4056		Azospirillum brasilense	2				GCF_019134655.1_ASM1913465v1_genomic.fna	Borreliella burgdorferi	99.389		Sinorhizobium meliloti	5
GCF_024662175.1_ASM2466217v1_genomic.fna	Borreliella burgdorferi	99.4422		Leptospira borgpetersenii	2				GCF_023035675.1_ASM2303567v1_genomic.fna	Borrelia hermsii DAH	96.4259		Lactiplantibacillus pentosus	5
GCF_003367295.1_ASM336729v1_genomic.fna	Borreliella burgdorferi	99.4422		Leptospira interrogans	2				GCF_023035795.1_ASM2303579v1_genomic.fna	Borrelia hermsii DAH	96.4259		Streptococcus dysgalactiae	5
GCF_023035795.1_ASM2303579v1_genomic.fna	Borrelia hermsii DAH	96.4259		Treponema phagedenis	2				GCF_024181445.1_ASM2418144v1_genomic.fna	Treponema denticola	97.1286		Staphylococcus haemolyticus	5
GCF_023035675.1_ASM2303567v1_genomic.fna	Borrelia hermsii DAH	96.4259		Treponema pallidum subsp. pallidum	2				GCF_024181545.1_ASM2418154v1_genomic.fna	Treponema denticola	97.1286		Streptococcus pyogenes	5
GCF_023035815.1_ASM2303581v1_genomic.fna	Borrelia parkeri	99.7763		Brachyspira hyodysenteriae WA1	2				GCF_024400725.1_ASM2440072v1_genomic.fna	Treponema denticola	97.1286		Legionella pneumophila	5
GCF_000512145.1_ASM51214v2_genomic.fna	Borrelia parkeri	99.7763		Treponema denticola	2				GCF_029866705.1_ASM2986670v1_genomic.fna	Treponema pallidum subsp. pallidum	99.8434		Propionibacterium freudenreichii	5
GCF_023035415.1_ASM2303541v1_genomic.fna	Borrelia turicatae	99.7925		Borrelia turicatae	2				GCF_005885795.1_ASM588579v1_genomic.fna	Treponema pallidum subsp. pallidum	99.8434		Enterobacter cloacae	5
GCF_023035855.1_ASM2303585v1_genomic.fna	Borrelia turicatae	99.7925		Borrelia parkeri	2				GCF_017161285.1_ASM1716128v1_genomic.fna	Treponema phagedenis	99.3952		Alcaligenes faecalis	5
GCF_024181405.1_ASM2418140v1_genomic.fna	Treponema denticola	95.4615		Borrelia hermsii DAH	2				GCF_008152825.1_ASM815282v1_genomic.fna	Treponema phagedenis	99.5292		Bacillus cereus	5
GCF_024181485.1_ASM2418148v1_genomic.fna	Treponema denticola	95.4615		Borreliella burgdorferi	2				GCF_013348685.1_ASM1334868v1_genomic.fna	Treponema phagedenis	99.5292		Piscirickettsia salmonis	5
GCF_000022105.1_ASM2210v1_genomic.fna	Brachyspira hyodysenteriae WA1	99.0229		Gimesia maris	2				GCF_022343825.1_ASM2234382v1_genomic.fna	Leptospira interrogans	98.8742		Bacillus subtilis	5
GCF_001676785.2_ASM167678v2_genomic.fna	Brachyspira hyodysenteriae WA1	99.0229		Lysobacter enzymogenes	2				GCF_014858865.1_ASM1485886v1_genomic.fna	Leptospira interrogans	99.0144		Actinobacillus pleuropneumoniae	5
GCF_029866705.1_ASM2986670v1_genomic.fna	Treponema pallidum subsp. pallidum	99.8434		Sorangium cellulosum	2				GCF_001010765.1_ASM101076v1_genomic.fna	Leptospira interrogans	99.0144		Ehrlichia ruminantium	5
GCF_005885795.1_ASM588579v1_genomic.fna	Treponema pallidum subsp. pallidum	99.8434		Corallococcus macrosporus	2				GCF_003516145.1_ASM351614v1_genomic.fna	Leptospira borgpetersenii	99.5079		Bacillus atrophaeus	5
GCF_017161285.1_ASM1716128v1_genomic.fna	Treponema phagedenis	99.3952		Myxococcus xanthus	2				GCF_024704545.1_ASM2470454v1_genomic.fna	Leptospira borgpetersenii	99.5079		Clostridium beijerinckii	5
GCF_013348685.1_ASM1334868v1_genomic.fna	Treponema phagedenis	99.3952		Escherichia coli	2				GCF_026410845.1_ASM2641084v1_genomic.fna	Leptospira borgpetersenii	99.5079		Avibacterium paragallinarum	5
GCF_005222585.1_ASM522258v1_genomic.fna	Leptospira interrogans	99.076							GCF_022023855.1_ASM2202385v1_genomic.fna	Azospirillum brasilense	95.3623		Campylobacter coli	5
GCF_022488445.1_ASM2248844v1_genomic.fna	Leptospira interrogans	99.076							GCF_005222205.1_ASM522220v1_genomic.fna	Azospirillum brasilense	95.3623		Campylobacter fetus	5
GCF_026410845.1_ASM2641084v1_genomic.fna	Leptospira borgpetersenii	97.8655							GCF_005222145.1_ASM522214v1_genomic.fna	Azospirillum brasilense	95.3623		Chlamydia trachomatis	5
GCF_024704545.1_ASM2470454v1_genomic.fna	Leptospira borgpetersenii	97.8655		mANI: max ANI value between the query genome and all other genomes					GCF_013391125.1_ASM1339112v1_genomic.fna	Campylobacter coli	99.1569		Haemophilus influenzae	5
GCF_022023855.1_ASM2202385v1_genomic.fna	Azospirillum brasilense	95.2181							GCF_014906205.1_ASM1490620v1_genomic.fna	Campylobacter coli	99.1569		Clostridium estertheticum subsp. estertheticum	5
GCF_005222205.1_ASM522220v1_genomic.fna	Azospirillum brasilense	95.2181							GCF_018885165.1_ASM1888516v1_genomic.fna	Campylobacter coli	99.1569		Clostridium botulinum	5
GCF_018885245.1_ASM1888524v1_genomic.fna	Campylobacter coli	98.9663							GCF_001865515.1_ASM186551v1_genomic.fna	Campylobacter coli	99.1709		Vibrio natriegens	5
GCF_008727315.1_ASM872731v1_genomic.fna	Campylobacter coli	98.9663							GCF_014906165.1_ASM1490616v1_genomic.fna	Campylobacter coli	99.1709		Helicobacter pylori	5
GCF_017896385.1_ASM1789638v1_genomic.fna	Campylobacter fetus subsp. fetus	99.5463							GCF_030544585.1_ASM3054458v1_genomic.fna	Campylobacter fetus	99.7464		Vibrio fluvialis	5
GCF_000759485.1_ASM75948v1_genomic.fna	Campylobacter fetus subsp. fetus	99.5463							GCF_011600995.2_ASM1160099v2_genomic.fna	Campylobacter fetus	99.7464		Ligilactobacillus salivarius	5
GCF_000772225.1_ASM77222v1_genomic.fna	Campylobacter jejuni	98.2546							GCF_017896385.1_ASM1789638v1_genomic.fna	Campylobacter fetus	99.7464		Pectobacterium carotovorum	4
GCF_014151665.1_ASM1415166v1_genomic.fna	Campylobacter jejuni	98.2546							GCF_011600955.2_ASM1160095v2_genomic.fna	Campylobacter fetus	99.7464		Listeria monocytogenes	4
GCF_003048875.2_ASM304887v2_genomic.fna	Campylobacter concisus	95.4533							GCF_007723545.1_ASM772354v1_genomic.fna	Campylobacter fetus	99.7464		Escherichia fergusonii	4
GCF_003048375.1_ASM304837v1_genomic.fna	Campylobacter concisus	95.4533							GCF_001506705.1_ASM150670v1_genomic.fna	Campylobacter jejuni	97.1615		Atlantibacter hermannii	4
GCF_013372125.1_ASM1337212v1_genomic.fna	Campylobacter curvus	95.8955							GCF_001870105.1_ASM187010v1_genomic.fna	Campylobacter jejuni	98.4957		Staphylococcus hominis	4
GCF_000017465.2_ASM1746v2_genomic.fna	Campylobacter curvus	95.8955							GCF_000009085.1_ASM908v1_genomic.fna	Campylobacter jejuni	98.4957		Cutibacterium acnes	4
GCF_000816385.2_ASM81638v2_genomic.fna	Campylobacter lari	97.8603							GCF_005844045.1_ASM584404v1_genomic.fna	Campylobacter hyointestinalis subsp. hyointestinalis	98.3269		Citrobacter freundii	4
GCF_001017575.1_ASM101757v1_genomic.fna	Campylobacter lari	97.8603							GCF_013372145.1_ASM1337214v1_genomic.fna	Campylobacter hyointestinalis subsp. hyointestinalis	98.3269		Hafnia alvei	4
GCF_004803775.1_ASM480377v1_genomic.fna	Campylobacter mucosalis	98.1423							GCF_003048875.2_ASM304887v2_genomic.fna	Campylobacter concisus	95.4533		Mammaliicoccus sciuri	4
GCF_013372205.1_ASM1337220v1_genomic.fna	Campylobacter mucosalis	98.1423							GCF_003048375.1_ASM304837v1_genomic.fna	Campylobacter concisus	95.4533		Klebsiella oxytoca	4
GCF_002220775.1_ASM222077v1_genomic.fna	Campylobacter sputorum	95.5129							GCF_015680025.1_ASM1568002v1_genomic.fna	Campylobacter concisus	95.4533		Bacteroides thetaiotaomicron	4
GCF_002220755.1_ASM222075v1_genomic.fna	Campylobacter sputorum	95.5129							GCF_000017465.2_ASM1746v2_genomic.fna	Campylobacter curvus	95.8955		Capnocytophaga ochracea	4
GCF_000255955.1_ASM25595v1_genomic.fna	Helicobacter pylori SJM180	95.7803							GCF_013372125.1_ASM1337212v1_genomic.fna	Campylobacter curvus	95.8955		Raoultella planticola	4
GCF_000148855.1_ASM14885v1_genomic.fna	Helicobacter pylori SJM180	95.7803							GCF_000816365.1_ASM81636v1_genomic.fna	Campylobacter lari	95.1617		Raoultella terrigena	4
GCF_000349975.1_ASM34997v1_genomic.fna	Helicobacter cinaedi	95.2703							GCF_001017575.1_ASM101757v1_genomic.fna	Campylobacter lari	97.9256		Aggregatibacter aphrophilus	4
GCF_021655575.1_ASM2165557v1_genomic.fna	Helicobacter cinaedi	95.2703							GCF_000816405.1_ASM81640v1_genomic.fna	Campylobacter lari	97.9256		Serratia liquefaciens	4
GCF_000740135.1_ASM74013v1_genomic.fna	Brucella abortus	99.8523							GCF_000816385.2_ASM81638v2_genomic.fna	Campylobacter lari	97.9256		Corynebacterium glutamicum	4
GCF_000740155.1_ASM74015v1_genomic.fna	Brucella abortus	99.8523							GCF_004803775.1_ASM480377v1_genomic.fna	Campylobacter mucosalis	98.1423		Fusobacterium necrophorum subsp. funduliforme	4
GCF_024223415.1_ASM2422341v1_genomic.fna	Escherichia coli	97.2822							GCF_013372205.1_ASM1337220v1_genomic.fna	Campylobacter mucosalis	98.1423		Oenococcus oeni	4
GCF_003790525.1_ASM379052v1_genomic.fna	Escherichia coli	97.2822							GCF_000021465.1_ASM2146v1_genomic.fna	Helicobacter pylori	95.8061		Yersinia intermedia	4
									GCF_900478295.1_35377_D02_genomic.fna	Helicobacter pylori	95.8061		Plesiomonas shigelloides	4
									GCF_000148855.1_ASM14885v1_genomic.fna	Helicobacter pylori	95.8061		Bordetella avium	4
									GCF_016748555.1_ASM1674855v1_genomic.fna	Helicobacter pylori	95.8061		Bifidobacterium pseudolongum	4
									GCF_006338045.1_ASM633804v1_genomic.fna	Helicobacter pylori	95.8061		Lactobacillus acetotolerans	4
									GCF_003214155.2_ASM321415v2_genomic.fna	Helicobacter cinaedi	99.2844		Erysipelothrix rhusiopathiae	4
									GCF_021655595.1_ASM2165559v1_genomic.fna	Helicobacter cinaedi	99.2844		Capnocytophaga sputigena	4
									GCF_021655575.1_ASM2165557v1_genomic.fna	Helicobacter cinaedi	99.2844		Vibrio parahaemolyticus	4
									GCF_014931155.1_ASM1493115v1_genomic.fna	Helicobacter cinaedi	99.2844		Streptococcus gordonii	4
									GCF_000740135.1_ASM74013v1_genomic.fna	Brucella abortus	99.8523		Streptococcus oralis	4
									GCF_000740155.1_ASM74015v1_genomic.fna	Brucella abortus	99.8523		Phocaeicola vulgatus	4
									GCF_024123775.1_ASM2412377v2_genomic.fna	Elizabethkingia meningoseptica	98.4405		Streptococcus uberis	4
									GCF_011612125.1_ASM1161212v1_genomic.fna	Elizabethkingia meningoseptica	98.4405		Helicobacter cinaedi	4
									GCF_009834475.1_ASM983447v1_genomic.fna	Empedobacter brevis	98.1728		Paenibacillus larvae subsp. pulvifaciens	4
									GCF_008705155.1_ASM870515v1_genomic.fna	Empedobacter brevis	98.1728		Lactococcus lactis	4
									GCF_900683405.1_57566_G01_genomic.fna	Chryseobacterium indologenes	99.3365		Bacillus thuringiensis	4
									GCF_002591275.1_ASM259127v1_genomic.fna	Chryseobacterium indologenes	99.3365		Geobacillus stearothermophilus	4
									GCF_002208925.2_ASM220892v2_genomic.fna	Chryseobacterium indologenes	99.3365		Burkholderia glumae	4
									GCF_003815935.1_ASM381593v1_genomic.fna	Chryseobacterium indologenes	99.3365		Paenibacillus polymyxa	4
									GCF_003815895.1_ASM381589v1_genomic.fna	Chryseobacterium indoltheticum	96.7677		Pseudomonas mendocina	4
									GCF_003815915.1_ASM381591v1_genomic.fna	Chryseobacterium indoltheticum	96.7677		Kingella kingae	4
									GCF_016657085.1_ASM1665708v1_genomic.fna	Chryseobacterium indoltheticum	96.7677		Burkholderia cepacia	4
									GCF_016726985.1_ASM1672698v1_genomic.fna	Myroides odoratus	95.6756		Pseudomonas aeruginosa	4
									GCF_016727005.1_ASM1672700v1_genomic.fna	Myroides odoratus	95.6756		Thermus thermophilus	4
									GCF_000833355.1_ASM83335v1_genomic.fna	Francisella tularensis subsp. novicida	98.466		Chryseobacterium indologenes	4
									GCF_000834965.1_ASM83496v1_genomic.fna	Francisella tularensis subsp. novicida	98.466		Bacillus licheniformis	4
									GCF_000833375.1_ASM83337v1_genomic.fna	Francisella tularensis subsp. novicida	98.466		Campylobacter lari	4
									GCF_019974395.1_ASM1997439v1_genomic.fna	Thermus thermophilus	97.7739		Mycobacterium ulcerans	4
									GCF_000258245.1_ASM25824v1_genomic.fna	Thermus thermophilus	97.7739		Enterococcus faecalis	4
									GCF_016629545.1_ASM1662954v1_genomic.fna	Thermus thermophilus	98.5175		Thermoclostridium stercorarium	4
									GCF_022846355.1_ASM2284635v1_genomic.fna	Thermus thermophilus	98.5175		Streptococcus sanguinis	4
									GCF_030121935.1_ASM3012193v1_genomic.fna	Pseudomonas aeruginosa	99.0974		Moraxella catarrhalis	4
									GCF_020990445.1_ASM2099044v1_genomic.fna	Pseudomonas aeruginosa	99.0974		Acinetobacter calcoaceticus	4
									GCF_000981825.1_ASM98182v1_genomic.fna	Pseudomonas aeruginosa	99.0974		Streptococcus suis	4
									GCF_027570595.1_ASM2757059v1_genomic.fna	Pseudomonas aeruginosa	99.0974		Lentilactobacillus buchneri	4
									GCF_001718395.1_ASM171839v1_genomic.fna	Burkholderia cepacia	98.3941		Neisseria gonorrhoeae	4
									GCF_009586235.1_ASM958623v1_genomic.fna	Burkholderia cepacia	98.3941		Streptococcus agalactiae	4
									GCF_023374475.1_ASM2337447v1_genomic.fna	Burkholderia cepacia	98.3941		Pseudomonas syringae pv. tomato	4
									GCF_001411495.1_ASM141149v1_genomic.fna	Burkholderia cepacia	98.3941		Mycolicibacterium smegmatis	4
									GCF_015476275.1_ASM1547627v1_genomic.fna	Pseudomonas fragi	98.9542		Methylococcus capsulatus	4
									GCF_002128325.1_ASM212832v1_genomic.fna	Pseudomonas fragi	98.9542		Streptococcus equinus	4
									GCF_015767515.1_ASM1576751v1_genomic.fna	Pseudomonas fragi	98.9542		Rhizobium leguminosarum	4
									GCF_017798225.1_ASM1779822v1_genomic.fna	Pseudomonas mendocina	98.0486		Clostridium sporogenes	4
									GCF_000204295.1_ASM20429v1_genomic.fna	Pseudomonas mendocina	98.0581		Fructilactobacillus sanfranciscensis	3
									GCF_000733715.2_ASM73371v2_genomic.fna	Pseudomonas mendocina	98.0978		Limosilactobacillus fermentum	3
									GCF_900636545.1_42727_C01_genomic.fna	Pseudomonas mendocina	98.0978		Cytobacillus firmus	3
									GCF_025985505.1_ASM2598550v1_genomic.fna	Pseudomonas putida	97.2221		Megasphaera elsdenii	3
									GCF_000495455.2_ASM49545v2_genomic.fna	Pseudomonas putida	97.2221		Bacillus mycoides	3
									GCF_022354785.1_ASM2235478v1_genomic.fna	Pseudomonas putida	97.2221		Brevibacillus laterosporus	3
									GCF_014884725.1_ASM1488472v1_genomic.fna	Ralstonia solanacearum	99.0065		Bacillus pumilus	3
									GCF_013306315.1_ASM1330631v1_genomic.fna	Ralstonia solanacearum	99.3669		Oxalobacter formigenes	3
									GCF_003515545.1_ASM351554v1_genomic.fna	Ralstonia solanacearum	99.3669		Ligilactobacillus ruminis	3
									GCF_006088755.1_ASM608875v1_genomic.fna	Ralstonia solanacearum	99.3669		Fusobacterium nucleatum	3
									GCF_011290465.1_ASM1129046v1_genomic.fna	Ralstonia solanacearum	99.3669		Anaplasma phagocytophilum str. JM	3
									GCF_024496225.1_ASM2449622v1_genomic.fna	Stutzerimonas stutzeri	98.0565		Parabacteroides distasonis	3
									GCF_021610005.1_ASM2161000v1_genomic.fna	Stutzerimonas stutzeri	98.0565		Wolbachia pipientis	3
									GCF_009578005.1_ASM957800v1_genomic.fna	Burkholderia glumae	99.4488		Pediococcus pentosaceus	3
									GCF_013122645.1_ASM1312264v1_genomic.fna	Burkholderia glumae	99.8787		Staphylococcus warneri	3
									GCF_024760585.1_ASM2476058v1_genomic.fna	Burkholderia glumae	99.8787		Streptococcus salivarius	3
									GCF_030505635.1_ASM3050563v1_genomic.fna	Burkholderia glumae	99.8787		Weissella confusa	3
									GCF_023221635.1_ASM2322163v1_genomic.fna	Xanthomonas translucens pv. secalis	99.5981		Streptococcus sobrinus	3
									GCF_017301775.1_ASM1730177v1_genomic.fna	Xanthomonas translucens pv. secalis	99.5981		Thomasclavelia ramosa	3
									GCF_003050685.1_ASM305068v1_genomic.fna	Xanthomonas translucens pv. secalis	99.5981		Streptococcus porcinus	3
									GCF_008330965.1_ASM833096v1_genomic.fna	Xanthomonas translucens pv. secalis	99.5981		Lactiplantibacillus plantarum	3
									GCF_021903295.1_ASM2190329v1_genomic.fna	Xanthomonas translucens pv. secalis	99.5981		Moorella thermoacetica	3
									GCF_006228425.1_ASM622842v1_genomic.fna	Xanthomonas citri	98.5563		Pediococcus acidilactici	3
									GCF_002139995.1_ASM213999v1_genomic.fna	Xanthomonas citri	98.5563		Cellulophaga lytica	3
									GCF_018831345.1_ASM1883134v1_genomic.fna	Xanthomonas citri	98.7264		Weissella paramesenteroides	3
									GCF_004000475.1_ASM400047v1_genomic.fna	Xanthomonas citri	98.7264		Lactococcus garvieae	3
									GCF_001610795.1_ASM161079v1_genomic.fna	Xanthomonas citri	98.7264		Leuconostoc lactis	3
									GCF_002220155.1_ASM222015v1_genomic.fna	Azotobacter chroococcum	98.5469		Lactococcus raffinolactis	3
									GCF_016406165.1_ASM1640616v1_genomic.fna	Azotobacter chroococcum	98.5469		Bacillus amyloliquefaciens	3
									GCF_000817975.1_ASM81797v1_genomic.fna	Azotobacter chroococcum	98.5469		[Clostridium] innocuum	3
									GCF_030506185.1_ASM3050618v1_genomic.fna	Azotobacter vinelandii	99.3801		Niallia circulans	3
									GCF_000380335.1_ASM38033v1_genomic.fna	Azotobacter vinelandii	99.3801		Lactobacillus amylovorus	3
									GCF_022760295.1_ASM2276029v1_genomic.fna	Agrobacterium tumefaciens	98.0161		Latilactobacillus sakei	3
									GCF_025560545.1_ASM2556054v1_genomic.fna	Agrobacterium tumefaciens	98.1918		Myxococcus xanthus	3
									GCF_003666445.1_ASM366644v1_genomic.fna	Agrobacterium tumefaciens	98.1918		Neisseria elongata	3
									GCF_021559735.1_ASM2155973v1_genomic.fna	Agrobacterium vitis	96.2612		Azotobacter chroococcum	3
									GCF_013427035.1_ASM1342703v1_genomic.fna	Agrobacterium vitis	96.2612		Citrobacter koseri	3
									GCF_021052365.1_ASM2105236v1_genomic.fna	Bradyrhizobium japonicum	95.1947		Chromobacterium violaceum	3
									GCF_013752735.1_ASM1375273v1_genomic.fna	Bradyrhizobium japonicum	95.1947		Brucella anthropi	3
									GCF_003177055.1_ASM317705v1_genomic.fna	Sinorhizobium fredii	99.6727		Orientia tsutsugamushi	3
									GCF_024400375.1_ASM2440037v1_genomic.fna	Sinorhizobium fredii	99.6727		Mycolicibacterium fortuitum	3
									GCF_002288485.1_ASM228848v1_genomic.fna	Sinorhizobium fredii	99.6727		Acinetobacter baumannii	3
									GCF_002197025.1_ASM219702v1_genomic.fna	Sinorhizobium meliloti	99.656		Legionella israelensis	3
									GCF_009664245.1_ASM966424v1_genomic.fna	Sinorhizobium meliloti	99.8054		Mycobacterium intracellulare	3
									GCF_002197445.1_ASM219744v1_genomic.fna	Sinorhizobium meliloti	99.8054		Gluconobacter oxydans	3
									GCF_000304415.1_RM41_genomic.fna	Sinorhizobium meliloti	99.8054		Methylorubrum extorquens	3
									GCF_002197085.1_ASM219708v1_genomic.fna	Sinorhizobium meliloti	99.8054		Rhizobium phaseoli	3
									GCF_011604565.1_ASM1160456v1_genomic.fna	Rhizobium leguminosarum	98.3277		Sinorhizobium fredii	3
									GCF_011604505.1_ASM1160450v1_genomic.fna	Rhizobium leguminosarum	98.342		Agrobacterium tumefaciens	3
									GCF_030053175.1_ASM3005317v1_genomic.fna	Rhizobium leguminosarum	98.342		Pseudomonas putida	3
									GCF_002953715.1_ASM295371v1_genomic.fna	Rhizobium leguminosarum	98.342		Pantoea ananatis	3
									GCF_001664105.1_ASM166410v1_genomic.fna	Rhizobium phaseoli	97.6988		Pseudomonas fragi	3
									GCF_000172715.2_ASM17271v2_genomic.fna	Rhizobium phaseoli	97.6988		Francisella tularensis subsp. novicida	3
									GCF_001664285.1_ASM166428v1_genomic.fna	Rhizobium phaseoli	97.6988		Chryseobacterium indoltheticum	3
									GCF_000731295.1_RG1141_Ch_pA_pB_genomic.fna	Neorhizobium galegae bv. orientalis str. HAMBI 540	95.1287		Campylobacter concisus	3
									GCF_000731315.1_RG540_Ch_pA_genomic.fna	Neorhizobium galegae bv. orientalis str. HAMBI 540	95.1287		Salmonella enterica	3
									GCF_000083545.1_ASM8354v1_genomic.fna	Methylorubrum extorquens	96.9178		Campylobacter jejuni	3
									GCF_026122595.1_ASM2612259v1_genomic.fna	Methylorubrum extorquens	96.9178		Azospirillum brasilense	3
									GCF_000022685.1_ASM2268v1_genomic.fna	Methylorubrum extorquens	96.9178		Leptospira borgpetersenii	3
									GCF_019285535.1_ASM1928553v1_genomic.fna	Methylococcus capsulatus	99.7338		Leptospira interrogans	3
									GCF_019285555.1_ASM1928555v1_genomic.fna	Methylococcus capsulatus	99.7338		Treponema phagedenis	3
									GCF_000008325.1_ASM832v1_genomic.fna	Methylococcus capsulatus	99.7338		Treponema denticola	3
									GCF_023370095.1_ASM2337009v1_genomic.fna	Methylococcus capsulatus	99.7338		Bifidobacterium longum	3
									GCF_014218315.1_ASM1421831v1_genomic.fna	Acetobacter aceti	96.4617		Lysobacter enzymogenes	3
									GCF_000193495.2_ASM19349v2_genomic.fna	Acetobacter aceti	96.4617		Pantoea agglomerans	3
									GCF_029229485.1_ASM2922948v1_genomic.fna	Novacetimonas hansenii	98.8971		Vibrio mimicus	3
									GCF_014843995.1_ASM1484399v1_genomic.fna	Novacetimonas hansenii	98.8971		Arsenophonus nasoniae	3
									GCF_030450005.1_ASM3045000v1_genomic.fna	Gluconobacter oxydans	97.612		Yersinia enterocolitica	3
									GCF_000583855.1_ASM58385v1_genomic.fna	Gluconobacter oxydans	97.612		Aggregatibacter actinomycetemcomitans	3
									GCF_900175995.1_ASM90017599v1_genomic.fna	Gluconobacter oxydans	97.612		Gallibacterium anatis	3
									GCF_019930805.1_ASM1993080v1_genomic.fna	Legionella pneumophila	97.3874		Providencia rettgeri	3
									GCF_030168615.1_ASM3016861v1_genomic.fna	Legionella pneumophila	99.7701		Yersinia pseudotuberculosis	3
									GCF_003004175.1_ASM300417v1_genomic.fna	Legionella pneumophila	99.7701		Shigella boydii	3
									GCF_030168655.1_ASM3016865v1_genomic.fna	Legionella pneumophila	99.7701		Listeria innocua	3
									GCF_026689395.1_ASM2668939v1_genomic.fna	Legionella pneumophila	99.7701		Shigella flexneri	3
									GCF_900637495.1_51342_D02_genomic.fna	Legionella spiritensis	98.2084		Grimontia hollisae	3
									GCF_900186965.1_50592_C01_genomic.fna	Legionella spiritensis	98.2084		Shigella sonnei	3
									GCF_004564155.1_ASM456415v1_genomic.fna	Legionella israelensis	98.2893		Haemophilus haemolyticus	3
									GCF_004571175.1_ASM457117v1_genomic.fna	Legionella israelensis	98.2893		Bifidobacterium dentium	3
									GCF_007361795.1_ASM736179v1_genomic.fna	Legionella israelensis	98.2893		Bifidobacterium adolescentis	2
									GCF_014874575.1_ASM1487457v1_genomic.fna	Acinetobacter baumannii	98.1747		Corynebacterium renale	2
									GCF_016864915.1_ASM1686491v1_genomic.fna	Acinetobacter baumannii	98.1747		Actinomyces naeslundii	2
									GCF_003431385.1_ASM343138v1_genomic.fna	Acinetobacter baumannii	98.1747		Streptomyces globisporus	2
									GCF_016939475.1_ASM1693947v1_genomic.fna	Acinetobacter calcoaceticus	97.0741		Streptomyces fradiae	2
									GCF_021165835.1_ASM2116583v1_genomic.fna	Acinetobacter calcoaceticus	97.1072		Streptomyces anulatus	2
									GCF_002055515.1_ASM205551v1_genomic.fna	Acinetobacter calcoaceticus	97.1072		Streptomyces ambofaciens	2
									GCF_021165855.1_ASM2116585v1_genomic.fna	Acinetobacter calcoaceticus	97.1072		Thermoanaerobacterium thermosaccharolyticum DSM 571	2
									GCF_003287015.1_ASM328701v1_genomic.fna	Moraxella bovis	98.3519		Clostridium tetani	2
									GCF_025984605.1_ASM2598460v1_genomic.fna	Moraxella bovis	98.3519		Companilactobacillus farciminis	2
									GCF_003971365.1_ASM397136v1_genomic.fna	Moraxella catarrhalis	99.3162		Acetivibrio thermocellus	2
									GCF_002073215.2_ASM207321v2_genomic.fna	Moraxella catarrhalis	99.3162		Ligilactobacillus murinus	2
									GCF_000092265.1_ASM9226v1_genomic.fna	Moraxella catarrhalis	99.3162		Synechococcus elongatus PCC 6301	2
									GCF_003971305.1_ASM397130v1_genomic.fna	Moraxella catarrhalis	99.3162		Listeria seeligeri	2
									GCF_011058675.1_ASM1105867v1_genomic.fna	Neisseria gonorrhoeae	99.5985		Pseudomonas amygdali pv. aesculi	2
									GCF_900087905.2_WHOU_genomic.fna	Neisseria gonorrhoeae	99.6391		Paeniclostridium sordellii	2
									GCF_003855355.1_ASM385535v1_genomic.fna	Neisseria gonorrhoeae	99.6391		Limosilactobacillus oris	2
									GCF_025170725.2_ASM2517072v2_genomic.fna	Neisseria gonorrhoeae	99.6391		Clostridium pasteurianum	2
									GCF_000818035.1_ASM81803v1_genomic.fna	Neisseria elongata	96.1445		Rhodococcus fascians	2
									GCF_003351685.1_ASM335168v1_genomic.fna	Neisseria elongata	96.445		Bifidobacterium bifidum	2
									GCF_003351545.1_ASM335154v1_genomic.fna	Neisseria elongata	96.445		Cellulosimicrobium cellulans	2
									GCF_011612705.1_ASM1161270v1_genomic.fna	Kingella kingae	99.6515		Eubacterium limosum	2
									GCF_900475905.1_49595_E01_genomic.fna	Kingella kingae	99.6515		Lactobacillus helveticus	2
									GCF_011045755.1_ASM1104575v1_genomic.fna	Kingella kingae	99.6515		Lactobacillus delbrueckii subsp. bulgaricus	2
									GCF_011612385.1_ASM1161238v1_genomic.fna	Kingella kingae	99.6515		Corynebacterium pseudotuberculosis	2
									GCF_001641975.2_ASM164197v2_genomic.fna	Alcaligenes faecalis	98.2178		Lacticaseibacillus paracasei	2
									GCF_027595045.1_ASM2759504v1_genomic.fna	Alcaligenes faecalis	98.2178		Acidipropionibacterium jensenii	2
									GCF_000967305.2_ASM96730v2_genomic.fna	Alcaligenes faecalis	98.3985		Limosilactobacillus reuteri	2
									GCF_010092625.1_ASM1009262v1_genomic.fna	Alcaligenes faecalis	98.3985		Corynebacterium diphtheriae	2
									GCF_023921285.1_ASM2392128v1_genomic.fna	Alcaligenes faecalis	98.3985		Levilactobacillus brevis	2
									GCF_000317935.1_ASM31793v1_genomic.fna	Bordetella parapertussis	99.2612		Clostridium baratii	2
									GCF_020735925.1_ASM2073592v1_genomic.fna	Bordetella parapertussis	99.2612		Bifidobacterium angulatum	2
									GCF_004009615.1_ASM400961v1_genomic.fna	Bordetella avium	99.5123		Mycobacterium tuberculosis	2
									GCF_012974605.1_ASM1297460v1_genomic.fna	Bordetella avium	99.6876		Corynebacterium stationis	2
									GCF_004009755.1_ASM400975v1_genomic.fna	Bordetella avium	99.6876		Mycobacterium marinum M	2
									GCF_000070465.1_ASM7046v1_genomic.fna	Bordetella avium	99.6876		Clostridium kluyveri	2
									GCF_015326295.1_ASM1532629v1_genomic.fna	Brucella anthropi	97.5268		Mycolicibacterium farcinogenes	2
									GCF_021165815.1_ASM2116581v1_genomic.fna	Brucella anthropi	99.2876		Bifidobacterium breve	2
									GCF_016128015.1_ASM1612801v1_genomic.fna	Brucella anthropi	99.2876		Corynebacterium xerosis	2
									GCF_012273555.1_ASM1227355v1_genomic.fna	Chromobacterium violaceum	98.5102		Ligilactobacillus agilis	2
									GCF_016890085.1_ASM1689008v1_genomic.fna	Chromobacterium violaceum	98.5102		Rhodococcus ruber	2
									GCF_000007705.1_ASM770v1_genomic.fna	Chromobacterium violaceum	98.5102		Weissella viridescens	2
									GCF_002947035.1_ASM294703v1_genomic.fna	Citrobacter koseri	98.953		Streptococcus pneumoniae	2
									GCF_905337845.2_AN2351v1_cp_genomic.fna	Citrobacter koseri	98.9664		Clostridioides difficile	2
									GCF_008693945.1_ASM869394v1_genomic.fna	Citrobacter koseri	98.9664		Vibrio cincinnatiensis	2
									GCF_029716005.1_ASM2971600v1_genomic.fna	Citrobacter freundii	98.821		Moraxella bovis	2
									GCF_030177735.1_ASM3017773v1_genomic.fna	Citrobacter freundii	98.821		Bordetella parapertussis	2
									GCF_003665655.1_ASM366565v1_genomic.fna	Citrobacter freundii	98.8459		Klebsiella aerogenes	2
									GCF_022646275.1_ASM2264627v1_genomic.fna	Citrobacter freundii	98.8459		Escherichia coli	2
									GCF_904863085.1_MINF_10B_genomic.fna	Klebsiella aerogenes	96.8499		Klebsiella pneumoniae	2
									GCF_024917575.1_ASM2491757v1_genomic.fna	Klebsiella aerogenes	96.8499		Proteus mirabilis	2
									GCF_001661985.2_ASM166198v2_genomic.fna	Pantoea agglomerans	98.6778		Proteus vulgaris	2
									GCF_003704305.1_ASM370430v1_genomic.fna	Pantoea agglomerans	98.6778		Providencia stuartii	2
									GCF_003860325.1_ASM386032v1_genomic.fna	Pantoea agglomerans	98.6778		Shigella dysenteriae	2
									GCF_023023085.1_ASM2302308v1_genomic.fna	Enterobacter cloacae	98.6472		Xenorhabdus nematophila	2
									GCF_018140965.1_ASM1814096v1_genomic.fna	Enterobacter cloacae	98.6472		Yersinia pestis	2
									GCF_009707405.1_ASM970740v1_genomic.fna	Enterobacter cloacae	98.6472		Edwardsiella tarda	2
									GCF_002303275.1_ASM230327v1_genomic.fna	Enterobacter cloacae	98.6472		Aeromonas hydrophila	2
									GCF_016864115.1_ASM1686411v1_genomic.fna	Enterobacter cloacae	98.6472		Aeromonas media	2
									GCF_002952035.2_ASM295203v2_genomic.fna	Pantoea ananatis	99.1461		Aeromonas schubertii	2
									GCF_025765855.1_ASM2576585v1_genomic.fna	Pantoea ananatis	99.1461		Aeromonas veronii	2
									GCF_000025405.2_ASM2540v1_genomic.fna	Pantoea ananatis	99.1461		Vibrio alginolyticus	2
									GCF_022392805.1_ASM2239280v1_genomic.fna	Pectobacterium carotovorum	98.1756		Legionella spiritensis	2
									GCF_009931215.1_ASM993121v1_genomic.fna	Pectobacterium carotovorum	98.1756		Novacetimonas hansenii	2
									GCF_016415585.1_ASM1641558v1_genomic.fna	Pectobacterium carotovorum	98.1756		Acetobacter aceti	2
									GCF_020520265.1_ASM2052026v1_genomic.fna	Pectobacterium carotovorum	98.1756		Campylobacter mucosalis	2
									GCF_013357365.1_ASM1335736v1_genomic.fna	Escherichia coli	97.0734		Sorangium cellulosum	2
									GCF_030013595.1_ASM3001359v1_genomic.fna	Escherichia coli	97.0734		Gimesia maris	2
									GCF_030035445.1_ASM3003544v1_genomic.fna	Escherichia fergusonii	98.7196		Borreliella burgdorferi	2
									GCF_008064895.1_ASM806489v1_genomic.fna	Escherichia fergusonii	98.8817		Borrelia hermsii DAH	2
									GCF_016128235.1_ASM1612823v1_genomic.fna	Escherichia fergusonii	98.8817		Treponema pallidum subsp. pallidum	2
									GCF_013812875.1_ASM1381287v1_genomic.fna	Escherichia fergusonii	98.8817		Clostridium butyricum	2
									GCF_011068345.1_ASM1106834v1_genomic.fna	Atlantibacter hermannii	98.9132		Campylobacter curvus	2
									GCF_016027855.1_ASM1602785v1_genomic.fna	Atlantibacter hermannii	98.9136		Brucella abortus	2
									GCF_008064855.1_ASM806485v1_genomic.fna	Atlantibacter hermannii	98.9136		Neorhizobium galegae bv. orientalis str. HAMBI 540	2
									GCF_030166395.1_ASM3016639v1_genomic.fna	Atlantibacter hermannii	98.9136		Elizabethkingia meningoseptica	2
									GCF_001636255.1_ASM163625v1_genomic.fna	Hafnia alvei	95.8546		Empedobacter brevis	2
									GCF_011617105.1_ASM1161710v1_genomic.fna	Hafnia alvei	99.0163		Myroides odoratus	2
									GCF_003253795.1_ASM325379v1_genomic.fna	Hafnia alvei	99.0163		Stutzerimonas stutzeri	2
									GCF_004328605.1_ASM432860v1_genomic.fna	Hafnia alvei	99.0163		Azotobacter vinelandii	2
									GCF_025579125.1_ASM2557912v2_genomic.fna	Klebsiella oxytoca	99.3168		Agrobacterium vitis	2
									GCF_016903975.1_ASM1690397v1_genomic.fna	Klebsiella oxytoca	99.3168		Bradyrhizobium japonicum	2
									GCF_025732175.1_ASM2573217v1_genomic.fna	Klebsiella oxytoca	99.3168		Vibrio vulnificus	2
									GCF_905322525.2_AI2623v1_cpp_genomic.fna	Klebsiella oxytoca	99.3168		Campylobacter hyointestinalis subsp. hyointestinalis	2
									GCF_002156725.1_ASM215672v1_genomic.fna	Klebsiella pneumoniae	98.883		Vibrio campbellii	2
									GCF_904866445.1_INF305_genomic.fna	Klebsiella pneumoniae	98.883		Kytococcus sedentarius	2
									GCF_008694045.1_ASM869404v1_genomic.fna	Raoultella planticola	99.3682		Staphylococcus hyicus	2
									GCF_022637595.1_ASM2263759v1_genomic.fna	Raoultella planticola	99.3682		Staphylococcus simulans	2
									GCF_029635815.1_ASM2963581v1_genomic.fna	Raoultella planticola	99.3682		Staphylococcus xylosus	2
									GCF_011290675.2_ASM1129067v2_genomic.fna	Raoultella planticola	99.3682		Streptococcus thermophilus	2
									GCF_030389145.1_ASM3038914v1_genomic.fna	Raoultella terrigena	98.9998		Streptococcus mutans	2
									GCF_012029655.1_ASM1202965v1_genomic.fna	Raoultella terrigena	99.0394		Corallococcus macrosporus	2
									GCF_902109485.1_39888_D01_genomic.fna	Raoultella terrigena	99.0394		Streptococcus canis	2
									GCF_015571975.1_ASM1557197v1_genomic.fna	Raoultella terrigena	99.0394		Streptococcus intermedius	2
									GCF_030062035.1_ASM3006203v1_genomic.fna	Proteus mirabilis	98.8217		Enterococcus gallinarum	2
									GCF_900635965.1_36374_E01_genomic.fna	Proteus mirabilis	98.8217		Brevibacillus brevis	2
									GCF_003812525.1_ASM381252v1_genomic.fna	Proteus vulgaris	99.4961		Heyndrickxia coagulans	2
									GCF_020097355.1_ASM2009735v1_genomic.fna	Proteus vulgaris	99.4961		Priestia megaterium DSM 319	2
									GCF_025583505.2_ASM2558350v2_genomic.fna	Providencia rettgeri	98.6722		Lysinibacillus sphaericus	2
									GCF_005155965.1_ASM515596v1_genomic.fna	Providencia rettgeri	98.6722		Parageobacillus thermoglucosidasius	2
									GCF_018861255.2_ASM1886125v2_genomic.fna	Providencia rettgeri	98.6722		Virgibacillus halodenitrificans	2
									GCF_002947315.1_ASM294731v1_genomic.fna	Providencia stuartii	99.1952		Paraclostridium bifermentans	2
									GCF_002983665.1_ASM298366v1_genomic.fna	Providencia stuartii	99.1952		Vibrio mediterranei	2
									GCF_000975245.1_ASM97524v1_genomic.fna	Serratia liquefaciens	98.7579		Staphylococcus epidermidis	2
									GCF_001559135.2_ASM155913v2_genomic.fna	Serratia liquefaciens	98.7579		Peribacillus simplex	2
									GCF_014495865.1_ASM1449586v1_genomic.fna	Serratia liquefaciens	98.9828		Kocuria rosea	2
									GCF_016728005.1_ASM1672800v1_genomic.fna	Serratia liquefaciens	98.9828		Desulfovibrio desulfuricans	2
									GCF_015074945.1_ASM1507494v1_genomic.fna	Serratia marcescens	98.664		Micrococcus luteus	2
									GCF_002220575.1_ASM222057v1_genomic.fna	Serratia marcescens	98.664		Pasteurella canis	2
									GCF_002996885.1_ASM299688v1_genomic.fna	Serratia marcescens	98.664		Rickettsia rickettsii str. Hlp#2	2
									GCF_003182655.1_ASM318265v1_genomic.fna	Serratia marcescens	98.664		Bacteroides fragilis	2
									GCF_009909385.1_ASM990938v1_genomic.fna	Serratia marcescens	98.664		Campylobacter ureolyticus	2
									GCF_000012025.1_ASM1202v1_genomic.fna	Shigella boydii	99.158		Faecalibacterium prausnitzii	2
									GCF_002950135.1_ASM295013v1_genomic.fna	Shigella boydii	99.158		Fusobacterium varium	2
									GCF_002950275.1_ASM295027v1_genomic.fna	Shigella boydii	99.158		[Haemophilus] ducreyi	2
									GCF_022354065.1_ASM2235406v1_genomic.fna	Shigella dysenteriae	97.7334		Acidithiobacillus ferrooxidans	2
									GCF_002949815.1_ASM294981v1_genomic.fna	Shigella dysenteriae	97.7334		Planktothrix agardhii	2
									GCF_022353785.1_ASM2235378v1_genomic.fna	Shigella flexneri	98.7353		Leuconostoc carnosum	2
									GCF_004171185.1_ASM417118v1_genomic.fna	Shigella flexneri	98.7353		Ehrlichia canis	2
									GCF_022494135.1_ASM2249413v1_genomic.fna	Shigella flexneri	98.7353		Actinobacillus suis	2
									GCF_013374815.1_ASM1337481v1_genomic.fna	Shigella sonnei	98.2392		Saprospira grandis	2
									GCF_003606425.1_ASM360642v1_genomic.fna	Shigella sonnei	99.7601		Cereibacter sphaeroides	2
									GCF_002142635.1_ASM214263v1_genomic.fna	Shigella sonnei	99.7601		Microcystis aeruginosa NIES-298	2
									GCF_000953355.1_XNC2_genomic.fna	Xenorhabdus nematophila	99.2142		Porphyromonas gingivalis	1
									GCF_003575005.1_ASM357500v1_genomic.fna	Xenorhabdus nematophila	99.2142		Enterococcus hirae	1
									GCF_016727905.1_ASM1672790v1_genomic.fna	Yersinia enterocolitica	96.9827		Enterococcus faecium	1
									GCF_025340245.1_ASM2534024v1_genomic.fna	Yersinia enterocolitica	96.9827		Streptococcus parauberis	1
									GCF_901472495.1_32868_C01_genomic.fna	Yersinia enterocolitica	96.9827		Streptococcus iniae	1
									GCF_900635455.1_28307_A01_genomic.fna	Yersinia intermedia	99.8837		Streptococcus anginosus	1
									GCF_009730075.1_ASM973007v1_genomic.fna	Yersinia intermedia	99.8837		Staphylococcus schleiferi	1
									GCF_026183345.1_ASM2618334v1_genomic.fna	Yersinia intermedia	99.8837		Rhodobacter capsulatus	1
									GCF_002983625.1_ASM298362v1_genomic.fna	Yersinia intermedia	99.8837		Finegoldia magna	1
									GCF_000018805.1_ASM1880v1_genomic.fna	Yersinia pestis	99.7558		Flavobacterium columnare	1
									GCF_003798225.1_ASM379822v1_genomic.fna	Yersinia pestis	99.7558		Bacteriovorax stolpii	1
									GCF_003798405.1_ASM379840v1_genomic.fna	Yersinia pseudotuberculosis	99.3638		Bdellovibrio bacteriovorus	1
									GCF_008693365.1_ASM869336v1_genomic.fna	Yersinia pseudotuberculosis	99.379		Desulfovibrio vulgaris	1
									GCF_000750315.1_ASM75031v1_genomic.fna	Yersinia pseudotuberculosis	99.379		Prevotella ruminicola 23	1
									GCF_029774215.1_ASM2977421v1_genomic.fna	Edwardsiella tarda	99.1864		Lactococcus cremoris subsp. cremoris KW2	1
									GCF_002504285.1_ASM250428v1_genomic.fna	Edwardsiella tarda	99.1864		Herbaspirillum seropedicae SmR1	1
									GCF_029873515.1_ASM2987351v1_genomic.fna	Arsenophonus nasoniae	99.1481		Loigolactobacillus coryniformis	1
									GCF_029873455.1_ASM2987345v1_genomic.fna	Arsenophonus nasoniae	99.1481		Bacillus anthracis	1
									GCF_029873495.1_ASM2987349v1_genomic.fna	Arsenophonus nasoniae	99.1481		Acidipropionibacterium acidipropionici	1
									GCF_018802305.1_ASM1880230v1_genomic.fna	Aeromonas hydrophila	96.9397		Bartonella quintana	1
									GCF_017310215.1_ASM1731021v1_genomic.fna	Aeromonas hydrophila	96.9397		Streptomyces albus	1
									GCF_014109865.1_ASM1410986v1_genomic.fna	Aeromonas media	97.1528		Rhodococcus rhodochrous	1
									GCF_000287215.2_ASM28721v3_genomic.fna	Aeromonas media	97.1528		Mycobacteroides chelonae	1
									GCF_004919485.1_ASM491948v1_genomic.fna	Aeromonas schubertii	98.6572		Mycobacterium avium subsp. hominissuis	1
									GCF_001447335.1_ASM144733v1_genomic.fna	Aeromonas schubertii	98.6572		Arachnia propionica	1
									GCF_029773485.1_ASM2977348v1_genomic.fna	Aeromonas veronii	96.011		Trueperella pyogenes	1
									GCF_002866885.2_ASM286688v2_genomic.fna	Aeromonas veronii	96.011		Bacillus methanolicus MGA3	1
									GCF_002953975.1_ASM295397v1_genomic.fna	Vibrio alginolyticus	98.4435		Limosilactobacillus vaginalis	1
									GCF_009665435.1_ASM966543v1_genomic.fna	Vibrio alginolyticus	98.4435		Ligilactobacillus animalis	1
									GCF_000328405.1_ASM32840v1_genomic.fna	Vibrio parahaemolyticus	98.292		Lentilactobacillus hilgardii	1
									GCF_003691525.1_ASM369152v1_genomic.fna	Vibrio parahaemolyticus	98.292		Lacticaseibacillus casei	1
									GCF_009763605.1_ASM976360v1_genomic.fna	Vibrio parahaemolyticus	98.292		Lactobacillus acidophilus	1
									GCF_025920025.1_ASM2592002v1_genomic.fna	Vibrio parahaemolyticus	98.292		Clostridium septicum	1
									GCF_014107515.1_ASM1410751v1_genomic.fna	Vibrio vulnificus	97.9937		Bacteroides uniformis	1
									GCF_030220165.1_ASM3022016v1_genomic.fna	Vibrio vulnificus	97.9937		Legionella longbeachae	1
									GCF_001558255.2_ASM155825v2_genomic.fna	Grimontia hollisae	99.2676		Coxiella burnetii RSA 331	1
									GCF_009763585.1_ASM976358v1_genomic.fna	Grimontia hollisae	99.2676		Pseudomonas fluorescens	1
									GCF_009665295.1_ASM966529v1_genomic.fna	Grimontia hollisae	99.2676		Mesorhizobium loti NZP2037	1
									GCF_001767355.1_ASM176735v1_genomic.fna	Vibrio mimicus	97.4607		Agrobacterium rhizogenes	1
									GCF_009764005.1_ASM976400v1_genomic.fna	Vibrio mimicus	97.4607		Xanthomonas oryzae pv. oryzae	1
									GCF_009763965.1_ASM976396v1_genomic.fna	Vibrio mimicus	97.4607		Xanthomonas campestris pv. campestris	1
									GCF_009763485.1_ASM976348v1_genomic.fna	Vibrio cincinnatiensis	99.0708		Pseudomonas syringae pv. syringae B301D	1
									GCF_009665395.1_ASM966539v1_genomic.fna	Vibrio cincinnatiensis	99.0708		Pseudomonas oleovorans CECT 5344	1
									GCF_009764195.1_ASM976419v1_genomic.fna	Vibrio fluvialis	98.4566		Comamonas testosteroni TK102	1
									GCF_009763185.1_ASM976318v1_genomic.fna	Vibrio fluvialis	98.4566		Pasteurella multocida	1
									GCF_002953375.1_ASM295337v1_genomic.fna	Vibrio fluvialis	98.4566		Campylobacter sputorum bv. faecalis CCUG 20703	1
									GCF_001952955.1_ASM195295v1_genomic.fna	Vibrio fluvialis	98.4566		Brachyspira hyodysenteriae	1
									GCF_030297535.1_ASM3029753v1_genomic.fna	Vibrio fluvialis	98.4566		Borrelia turicatae	1
									GCF_024442155.1_ASM2444215v1_genomic.fna	Vibrio campbellii	96.5405		Borrelia parkeri HR1	1
									GCF_002142655.1_ASM214265v1_genomic.fna	Vibrio campbellii	96.5405		Shewanella putrefaciens	1
									GCF_002214345.1_ASM221434v1_genomic.fna	Vibrio mediterranei	96.8187		Buchnera aphidicola str. 5A (Acyrthosiphon pisum)	1
									GCF_003726935.1_ASM372693v1_genomic.fna	Vibrio mediterranei	96.8187		Acetobacter pasteurianus subsp. pasteurianus	1
									GCF_001680085.1_ASM168008v1_genomic.fna	Vibrio natriegens	98.035		Legionella micdadei	1
									GCF_001680065.1_ASM168006v1_genomic.fna	Vibrio natriegens	98.0682		Neisseria lactamica	1
									GCF_025757485.1_ASM2575748v1_genomic.fna	Vibrio natriegens	98.0682		Neisseria meningitidis	1
									GCF_022832815.1_ASM2283281v1_genomic.fna	Vibrio natriegens	98.1937		Bordetella bronchiseptica	1
									GCF_001680045.1_ASM168004v1_genomic.fna	Vibrio natriegens	98.1937		Zymomonas mobilis subsp. mobilis NCIMB 11163	1
									GCF_014854595.1_ASM1485459v1_genomic.fna	Plesiomonas shigelloides	97.4583		Morganella morganii subsp. morganii	1
									GCF_003019855.1_ASM301985v1_genomic.fna	Plesiomonas shigelloides	97.4583		Aeromonas salmonicida	1
									GCF_020991025.1_ASM2099102v1_genomic.fna	Plesiomonas shigelloides	97.4583		Aeromonas caviae	1
									GCF_900087055.1_31289_E01_genomic.fna	Plesiomonas shigelloides	97.4583		Aeromonas jandaei	1
									GCF_008086385.1_ASM808638v1_genomic.fna	Aggregatibacter actinomycetemcomitans	97.3659		Aeromonas allosaccharophila	1
									GCF_024730745.1_ASM2473074v1_genomic.fna	Aggregatibacter actinomycetemcomitans	97.6073		Vibrio cholerae	1
									GCF_001594265.1_ASM159426v1_genomic.fna	Aggregatibacter actinomycetemcomitans	97.6073		Vibrio harveyi	1
									GCF_900638445.1_57675_E01_genomic.fna	Actinobacillus pleuropneumoniae	98.7118		Actinobacillus equuli subsp. haemolyticus	1
									GCF_021952485.1_ASM2195248v1_genomic.fna	Actinobacillus pleuropneumoniae	98.7118		Haemophilus parainfluenzae	1
									GCF_000020405.1_ASM2040v1_genomic.fna	Actinobacillus pleuropneumoniae	98.7118		Histophilus somni	1
									GCF_021957105.1_ASM2195710v1_genomic.fna	Actinobacillus pleuropneumoniae	98.7118		Glaesserella parasuis D74	1
									GCF_017357465.1_ASM1735746v1_genomic.fna	Actinobacillus pleuropneumoniae	98.7118		Pseudomonas chlororaphis subsp. aureofaciens	1
									GCF_900187155.1_51726_C01_genomic.fna	Actinobacillus suis	99.824
									GCF_024205305.1_ASM2420530v1_genomic.fna	Actinobacillus suis	99.824
									GCF_019973675.1_ASM1997367v1_genomic.fna	Haemophilus haemolyticus	95.7068
									GCF_900477945.1_45473_H02_genomic.fna	Haemophilus haemolyticus	95.7068
									GCF_003351625.1_ASM335162v1_genomic.fna	Haemophilus haemolyticus	95.7068
									GCF_019703575.1_ASM1970357v1_genomic.fna	Haemophilus influenzae	97.2851
									GCF_003425955.1_ASM342595v1_genomic.fna	Haemophilus influenzae	98.2126
									GCF_000931575.1_ASM93157v1_genomic.fna	Haemophilus influenzae	98.2126
									GCF_000698365.1_ASM69836v1_genomic.fna	Haemophilus influenzae	98.2126
									GCF_003425625.1_ASM342562v1_genomic.fna	Haemophilus influenzae	98.2126
									GCF_025884415.1_ASM2588441v1_genomic.fna	Avibacterium paragallinarum	97.1319
									GCF_022964995.1_ASM2296499v1_genomic.fna	Avibacterium paragallinarum	99.805
									GCF_012850815.1_ASM1285081v1_genomic.fna	Avibacterium paragallinarum	99.8876
									GCF_019822885.1_ASM1982288v1_genomic.fna	Avibacterium paragallinarum	99.8876
									GCF_000969315.2_ASM96931v2_genomic.fna	Avibacterium paragallinarum	99.8876
									GCF_001647915.1_ASM164791v1_genomic.fna	[Haemophilus] ducreyi	97.6544
									GCF_001647835.1_ASM164783v1_genomic.fna	[Haemophilus] ducreyi	97.6544
									GCF_001262035.1_ASM126203v1_genomic.fna	Aggregatibacter aphrophilus	96.2632
									GCF_900478265.1_33962_C02_genomic.fna	Aggregatibacter aphrophilus	98.2874
									GCF_900636915.1_45532_F02_genomic.fna	Aggregatibacter aphrophilus	98.2874
									GCF_001188835.1_ASM118883v1_genomic.fna	Aggregatibacter aphrophilus	98.2874
									GCF_002263255.2_ASM226325v2_genomic.fna	Gallibacterium anatis	97.5097
									GCF_026013665.1_ASM2601366v1_genomic.fna	Gallibacterium anatis	97.5097
									GCF_000209675.1_ASM20967v1_genomic.fna	Gallibacterium anatis	97.5097
									GCF_020810675.1_ASM2081067v1_genomic.fna	Pasteurella canis	98.7528
									GCF_020034555.1_ASM2003455v1_genomic.fna	Pasteurella canis	98.7528
									GCF_000050405.1_ASM5040v1_genomic.fna	Ehrlichia ruminantium	98.2841
									GCF_013461585.1_ASM1346158v1_genomic.fna	Ehrlichia ruminantium	98.9523
									GCF_013460375.1_ASM1346037v1_genomic.fna	Ehrlichia ruminantium	99.6751
									GCF_013462075.1_ASM1346207v1_genomic.fna	Ehrlichia ruminantium	99.6751
									GCF_013461095.1_ASM1346109v1_genomic.fna	Ehrlichia ruminantium	99.6751
									GCF_000283775.1_ASM28377v1_genomic.fna	Rickettsia rickettsii str. Hlp#2	99.5837
									GCF_000283935.1_ASM28393v1_genomic.fna	Rickettsia rickettsii str. Hlp#2	99.5837
									GCF_900327265.1_Kato_genomic.fna	Orientia tsutsugamushi	98.4645
									GCF_900327275.1_Karp_genomic.fna	Orientia tsutsugamushi	98.4645
									GCF_000010205.1_ASM1020v1_genomic.fna	Orientia tsutsugamushi	98.4645
									GCF_000026925.1_ASM2692v1_genomic.fna	Chlamydia trachomatis	99.8507
									GCF_000507225.1_ASM50722v1_genomic.fna	Chlamydia trachomatis	99.8507
									GCF_002777135.1_ASM277713v1_genomic.fna	Chlamydia trachomatis	99.8507
									GCF_000441795.1_ASM44179v1_genomic.fna	Chlamydia trachomatis	99.8507
									GCF_018336315.1_ASM1833631v1_genomic.fna	Chlamydia trachomatis	99.8507
									GCF_016889925.1_ASM1688992v1_genomic.fna	Bacteroides fragilis	99.0788
									GCF_000965785.1_ASM96578v1_genomic.fna	Bacteroides fragilis	99.0788
									GCF_024759205.1_ASM2475920v1_genomic.fna	Bacteroides thetaiotaomicron	98.9126
									GCF_022453665.1_ASM2245366v1_genomic.fna	Bacteroides thetaiotaomicron	98.9688
									GCF_024758905.1_ASM2475890v1_genomic.fna	Bacteroides thetaiotaomicron	98.9688
									GCF_001314975.1_ASM131497v1_genomic.fna	Bacteroides thetaiotaomicron	98.9688
									GCF_020885775.1_ASM2088577v1_genomic.fna	Phocaeicola vulgatus	98.5794
									GCF_024022975.1_ASM2402297v1_genomic.fna	Phocaeicola vulgatus	99.5876
									GCF_024759565.1_ASM2475956v1_genomic.fna	Phocaeicola vulgatus	99.5876
									GCF_020091465.1_ASM2009146v1_genomic.fna	Phocaeicola vulgatus	99.5876
									GCF_018288975.1_ASM1828897v1_genomic.fna	Parabacteroides distasonis	98.5499
									GCF_006739545.1_ASM673954v1_genomic.fna	Parabacteroides distasonis	98.5499
									GCF_024759625.1_ASM2475962v1_genomic.fna	Parabacteroides distasonis	98.5499
									GCF_001190755.1_ASM119075v1_genomic.fna	Campylobacter ureolyticus	95.6337
									GCF_013372225.1_ASM1337222v1_genomic.fna	Campylobacter ureolyticus	95.6337
									GCF_027116455.1_ASM2711645v1_genomic.fna	Oxalobacter formigenes	99.8579
									GCF_002127965.1_ASM212796v1_genomic.fna	Oxalobacter formigenes	99.8579
									GCF_027116415.1_ASM2711641v1_genomic.fna	Oxalobacter formigenes	99.8579
									GCF_013137915.1_ASM1313791v1_genomic.fna	Fusobacterium nucleatum	96.0945
									GCF_027947475.1_ASM2794747v1_genomic.fna	Fusobacterium nucleatum	97.2138
									GCF_028735995.1_ASM2873599v1_genomic.fna	Fusobacterium nucleatum	97.2138
									GCF_951792925.1_DSM32379_genomic.fna	Faecalibacterium prausnitzii	96.9139
									GCF_019968035.1_ASM1996803v1_genomic.fna	Faecalibacterium prausnitzii	96.9139
									GCF_025757605.1_ASM2575760v1_genomic.fna	Fusobacterium varium	98.8106
									GCF_003019655.1_ASM301965v1_genomic.fna	Fusobacterium varium	98.8106
									GCF_003019715.1_ASM301971v1_genomic.fna	Fusobacterium necrophorum subsp. funduliforme	98.7744
									GCF_003732505.1_ASM373250v1_genomic.fna	Fusobacterium necrophorum subsp. funduliforme	98.7744
									GCF_004006635.1_ASM400663v1_genomic.fna	Fusobacterium necrophorum subsp. funduliforme	98.7744
									GCF_003732525.1_ASM373252v1_genomic.fna	Fusobacterium necrophorum subsp. funduliforme	98.7744
									GCF_021365555.1_ASM2136555v1_genomic.fna	Desulfovibrio desulfuricans	95.5984
									GCF_017815575.1_ASM1781557v1_genomic.fna	Desulfovibrio desulfuricans	95.5984
									GCF_001304715.1_ASM130471v1_genomic.fna	Megasphaera elsdenii	97.8719
									GCF_003010495.1_ASM301049v1_genomic.fna	Megasphaera elsdenii	98.2031
									GCF_003006415.1_ASM300641v1_genomic.fna	Megasphaera elsdenii	98.2031
									GCF_013462805.1_ASM1346280v1_genomic.fna	Acidithiobacillus ferrooxidans	99.6315
									GCF_000020825.1_ASM2082v1_genomic.fna	Acidithiobacillus ferrooxidans	99.6315
									GCF_000012565.1_ASM1256v1_genomic.fna	Ehrlichia canis	99.8216
									GCF_002879995.1_ASM287999v1_genomic.fna	Ehrlichia canis	99.8216
									GCF_000689635.2_ASM68963v2_genomic.fna	Anaplasma phagocytophilum str. JM	97.2544
									GCF_000439775.1_ASM43977v1_genomic.fna	Anaplasma phagocytophilum str. JM	97.2544
									GCF_013487825.1_ASM1348782v1_genomic.fna	Anaplasma phagocytophilum str. JM	97.2544
									GCF_007972595.1_ASM797259v1_genomic.fna	Wolbachia pipientis	99.4069
									GCF_009732755.1_ASM973275v1_genomic.fna	Wolbachia pipientis	99.4069
									GCF_017604245.1_ASM1760424v1_genomic.fna	Wolbachia pipientis	99.4069
									GCF_000190595.1_ASM19059v1_genomic.fna	Cellulophaga lytica	99.3757
									GCF_000750195.1_ASM75019v1_genomic.fna	Cellulophaga lytica	99.3757
									GCF_001941605.1_ASM194160v1_genomic.fna	Cellulophaga lytica	99.3757
									GCF_000250635.1_ASM25063v1_genomic.fna	Saprospira grandis	96.606
									GCF_027594745.1_ASM2759474v1_genomic.fna	Saprospira grandis	96.606
									GCF_026013825.1_ASM2601382v1_genomic.fna	Capnocytophaga ochracea	96.7247
									GCF_026013785.1_ASM2601378v1_genomic.fna	Capnocytophaga ochracea	96.7247
									GCF_019930725.1_ASM1993072v1_genomic.fna	Capnocytophaga ochracea	96.7247
									GCF_026013805.1_ASM2601380v1_genomic.fna	Capnocytophaga ochracea	96.7247
									GCF_900638125.1_56080_B02_genomic.fna	Capnocytophaga sputigena	98.4278
									GCF_002302395.1_ASM230239v1_genomic.fna	Capnocytophaga sputigena	98.4278
									GCF_002302495.1_ASM230249v1_genomic.fna	Capnocytophaga sputigena	98.4278
									GCF_002302595.1_ASM230259v1_genomic.fna	Capnocytophaga sputigena	98.4278
									GCF_000021005.1_ASM2100v1_genomic.fna	Cereibacter sphaeroides	95.355
									GCF_005311585.1_ASM531158v1_genomic.fna	Cereibacter sphaeroides	95.355
									GCF_025811435.1_ASM2581143v1_genomic.fna	Rhodopseudomonas palustris	97.0093
									GCF_003031245.1_ASM303124v1_genomic.fna	Rhodopseudomonas palustris	97.0228
									GCF_003031265.1_ASM303126v1_genomic.fna	Rhodopseudomonas palustris	97.0228
									GCF_025811355.1_ASM2581135v1_genomic.fna	Rhodopseudomonas palustris	97.0228
									GCF_025811215.1_ASM2581121v1_genomic.fna	Rhodopseudomonas palustris	97.0228
									GCF_010196425.1_ASM1019642v1_genomic.fna	Microcystis aeruginosa NIES-298	96.4199
									GCF_002095975.1_ASM209597v1_genomic.fna	Microcystis aeruginosa NIES-298	96.4199
									GCF_904830935.1_P._agardhii_No.976_genomic.fna	Planktothrix agardhii	99.1138
									GCF_904830915.1_P._agardhii_PCC7805_genomic.fna	Planktothrix agardhii	99.1138
									GCF_009708755.1_ASM970875v1_genomic.fna	Piscirickettsia salmonis	99.8751
									GCF_009709415.1_ASM970941v1_genomic.fna	Piscirickettsia salmonis	99.8751
									GCF_009709515.1_ASM970951v1_genomic.fna	Piscirickettsia salmonis	99.8751
									GCF_009709015.1_ASM970901v1_genomic.fna	Piscirickettsia salmonis	99.8751
									GCF_003850185.1_ASM385018v1_genomic.fna	Piscirickettsia salmonis	99.8751
									GCF_001047695.1_ASM104769v1_genomic.fna	Leuconostoc mesenteroides	98.8622
									GCF_004102585.1_ASM410258v1_genomic.fna	Leuconostoc mesenteroides	99.7369
									GCF_009913935.1_ASM991393v1_genomic.fna	Leuconostoc mesenteroides	99.7369
									GCF_003255835.1_ASM325583v1_genomic.fna	Leuconostoc mesenteroides	99.7369
									GCF_024800105.1_ASM2480010v1_genomic.fna	Leuconostoc mesenteroides	99.7369
									GCF_007954665.1_ASM795466v1_genomic.fna	Leuconostoc lactis	97.6423
									GCF_007954605.1_ASM795460v1_genomic.fna	Leuconostoc lactis	97.9293
									GCF_001698145.1_ASM169814v1_genomic.fna	Leuconostoc lactis	97.9293
									GCF_020510245.1_ASM2051024v1_genomic.fna	Oenococcus oeni	98.8005
									GCF_002966535.1_ASM296653v1_genomic.fna	Oenococcus oeni	98.8005
									GCF_023920145.1_ASM2392014v1_genomic.fna	Oenococcus oeni	98.8005
									GCF_900519475.1_CRBO_1381_PRJEB28094_wgs_genomic.fna	Oenococcus oeni	98.8005
									GCF_030168775.1_ASM3016877v1_genomic.fna	Weissella paramesenteroides	98.5459
									GCF_002386265.1_ASM238626v1_genomic.fna	Weissella paramesenteroides	98.5459
									GCF_028994215.1_ASM2899421v1_genomic.fna	Weissella paramesenteroides	98.5459
									GCF_007954525.1_ASM795452v1_genomic.fna	Leuconostoc carnosum	99.781
									GCF_000300135.1_ASM30013v1_genomic.fna	Leuconostoc carnosum	99.781
									GCF_004103635.1_ASM410363v1_genomic.fna	Pediococcus acidilactici	97.2589
									GCF_019844055.1_ASM1984405v1_genomic.fna	Pediococcus acidilactici	98.6693
									GCF_030220125.1_ASM3022012v1_genomic.fna	Pediococcus acidilactici	98.6693
									GCF_002982155.1_ASM298215v1_genomic.fna	Pediococcus pentosaceus	99.0408
									GCF_000014505.1_ASM1450v1_genomic.fna	Pediococcus pentosaceus	99.0408
									GCF_002202155.1_ASM220215v1_genomic.fna	Pediococcus pentosaceus	99.0408
									GCF_009769055.1_ASM976905v1_genomic.fna	Micrococcus luteus	98.0362
									GCF_009730415.1_ASM973041v1_genomic.fna	Micrococcus luteus	98.0362
									GCF_030412635.1_ASM3041263v1_genomic.fna	Kocuria rosea	98.9467
									GCF_900638085.1_55884_B01_genomic.fna	Kocuria rosea	98.9467
									GCF_000023925.1_ASM2392v1_genomic.fna	Kytococcus sedentarius	96.9676
									GCF_016889285.1_ASM1688928v1_genomic.fna	Kytococcus sedentarius	96.9676
									GCF_030533875.1_ASM3053387v1_genomic.fna	Staphylococcus aureus	98.1182
									GCF_900474575.1_40415_F02_genomic.fna	Staphylococcus aureus	98.5938
									GCF_003193745.1_ASM319374v1_genomic.fna	Staphylococcus aureus	98.5938
									GCF_001640905.1_ASM164090v1_genomic.fna	Staphylococcus aureus	99.7685
									GCF_009176785.1_ASM917678v1_genomic.fna	Staphylococcus aureus	99.7685
									GCF_001701005.1_ASM170100v1_genomic.fna	Staphylococcus carnosus	99.7434
									GCF_024172425.1_ASM2417242v1_genomic.fna	Staphylococcus carnosus	99.7434
									GCF_024172365.1_ASM2417236v1_genomic.fna	Staphylococcus carnosus	99.7434
									GCF_016890025.1_ASM1689002v1_genomic.fna	Staphylococcus carnosus	99.8299
									GCF_024172525.1_ASM2417252v1_genomic.fna	Staphylococcus carnosus	99.8299
									GCF_024204945.1_ASM2420494v1_genomic.fna	Staphylococcus epidermidis	99.2839
									GCF_009685135.1_ASM968513v1_genomic.fna	Staphylococcus epidermidis	99.2839
									GCF_017355005.1_ASM1735500v1_genomic.fna	Staphylococcus haemolyticus	98.5628
									GCF_002906595.1_ASM290659v1_genomic.fna	Staphylococcus haemolyticus	99.5631
									GCF_009932885.2_ASM993288v2_genomic.fna	Staphylococcus haemolyticus	99.5631
									GCF_009189185.2_ASM918918v2_genomic.fna	Staphylococcus haemolyticus	99.5631
									GCF_021442105.1_ASM2144210v1_genomic.fna	Staphylococcus haemolyticus	99.5631
									GCF_900474585.1_41315_E01_genomic.fna	Staphylococcus hyicus	98.9047
									GCF_028748305.1_ASM2874830v1_genomic.fna	Staphylococcus hyicus	98.9047
									GCF_900474685.1_40961_B01_genomic.fna	Staphylococcus simulans	98.844
									GCF_025561465.1_ASM2556146v1_genomic.fna	Staphylococcus simulans	98.844
									GCF_000706685.1_ASM70668v1_genomic.fna	Staphylococcus xylosus	99.5867
									GCF_020229655.1_ASM2022965v1_genomic.fna	Staphylococcus xylosus	99.5867
									GCF_023277465.1_ASM2327746v1_genomic.fna	Staphylococcus hominis	99.0092
									GCF_007814725.1_ASM781472v1_genomic.fna	Staphylococcus hominis	99.0092
									GCF_013267575.1_ASM1326757v1_genomic.fna	Staphylococcus hominis	99.2337
									GCF_003812505.1_ASM381250v1_genomic.fna	Staphylococcus hominis	99.2337
									GCF_003691405.1_ASM369140v1_genomic.fna	Staphylococcus warneri	99.5549
									GCF_900636255.1_40295_A02_genomic.fna	Staphylococcus warneri	99.5549
									GCF_029023845.1_ASM2902384v1_genomic.fna	Staphylococcus warneri	99.5549
									GCF_019272915.1_ASM1927291v1_genomic.fna	Mammaliicoccus sciuri	97.7766
									GCF_025561025.1_ASM2556102v1_genomic.fna	Mammaliicoccus sciuri	97.7766
									GCF_016067395.1_ASM1606739v1_genomic.fna	Mammaliicoccus sciuri	98.0211
									GCF_016128315.1_ASM1612831v1_genomic.fna	Mammaliicoccus sciuri	98.0211
									GCF_002073435.2_ASM207343v2_genomic.fna	Streptococcus gordonii	97.6077
									GCF_019046945.1_ASM1904694v1_genomic.fna	Streptococcus gordonii	97.6077
									GCF_001281105.1_ASM128110v1_genomic.fna	Streptococcus gordonii	97.6077
									GCF_002386285.1_ASM238628v1_genomic.fna	Streptococcus gordonii	97.6077
									GCF_019334565.1_ASM1933456v1_genomic.fna	Streptococcus oralis	95.3889
									GCF_900637025.1_46338_H01_genomic.fna	Streptococcus oralis	96.0231
									GCF_016549395.1_ASM1654939v1_genomic.fna	Streptococcus oralis	96.0231
									GCF_024399415.1_ASM2439941v1_genomic.fna	Streptococcus oralis	96.0231
									GCF_900636435.1_42197_C01_genomic.fna	Streptococcus salivarius	96.7692
									GCF_002094955.1_ASM209495v1_genomic.fna	Streptococcus salivarius	96.7692
									GCF_000253335.1_ASM25333v1_genomic.fna	Streptococcus salivarius	96.7692
									GCF_013343115.1_ASM1334311v1_genomic.fna	Streptococcus sanguinis	95.6699
									GCF_000014205.1_ASM1420v1_genomic.fna	Streptococcus sanguinis	95.6699
									GCF_900475275.1_42685_F01_genomic.fna	Streptococcus sanguinis	95.6699
									GCF_900475505.1_42925_G01_genomic.fna	Streptococcus sanguinis	95.6699
									GCF_902702765.1_GD-0088_genomic.fna	Streptococcus suis	97.8441
									GCF_000494895.1_ASM49489v1_genomic.fna	Streptococcus suis	97.8441
									GCF_022964955.1_ASM2296495v1_genomic.fna	Streptococcus suis	97.8441
									GCF_029542025.1_ASM2954202v1_genomic.fna	Streptococcus suis	97.8441
									GCF_017360005.1_ASM1736000v1_genomic.fna	Streptococcus thermophilus	98.9318
									GCF_002286255.1_ASM228625v1_genomic.fna	Streptococcus thermophilus	98.9318
									GCF_002995555.1_ASM299555v1_genomic.fna	Streptococcus mutans	98.9434
									GCF_030294905.1_ASM3029490v1_genomic.fna	Streptococcus mutans	98.9434
									GCF_003172975.1_ASM317297v1_genomic.fna	Streptococcus sobrinus	98.9884
									GCF_900475395.1_43908_H01_genomic.fna	Streptococcus sobrinus	98.9884
									GCF_900475365.1_43908_G01_genomic.fna	Streptococcus sobrinus	98.9884
									GCF_000831145.1_ASM83114v1_genomic.fna	Streptococcus agalactiae	98.8883
									GCF_021655535.1_ASM2165553v1_genomic.fna	Streptococcus agalactiae	98.9309
									GCF_029917085.1_ASM2991708v1_genomic.fna	Streptococcus agalactiae	98.9309
									GCF_949789875.1_23495_7_287_h_nanopore_genomic.fna	Streptococcus agalactiae	98.9309
									GCF_022068885.1_ASM2206888v1_genomic.fna	Streptococcus pneumoniae	98.5344
									GCF_001896045.1_ASM189604v1_genomic.fna	Streptococcus pneumoniae	98.5344
									GCF_004123995.1_ASM412399v1_genomic.fna	Streptococcus pyogenes	98.9989
									GCF_900475085.1_42206_C01_genomic.fna	Streptococcus pyogenes	98.9989
									GCF_014191695.1_ASM1419169v1_genomic.fna	Streptococcus pyogenes	98.9989
									GCF_005161605.1_ASM516160v1_genomic.fna	Streptococcus pyogenes	98.9989
									GCF_900474455.1_42017_D01_genomic.fna	Streptococcus pyogenes	98.9989
									GCF_010993865.2_ASM1099386v2_genomic.fna	Streptococcus canis	98.7956
									GCF_900636575.1_42912_C01_genomic.fna	Streptococcus canis	98.7956
									GCF_016128095.1_ASM1612809v1_genomic.fna	Streptococcus dysgalactiae	98.8071
									GCF_900636815.1_44503_D02_genomic.fna	Streptococcus dysgalactiae	98.8071
									GCF_016128135.1_ASM1612813v1_genomic.fna	Streptococcus dysgalactiae	98.9931
									GCF_900474785.1_41767_C01_genomic.fna	Streptococcus dysgalactiae	98.9931
									GCF_029234135.1_ASM2923413v1_genomic.fna	Streptococcus dysgalactiae	98.9931
									GCF_900636465.1_42290_E02_genomic.fna	Streptococcus equinus	98.1514
									GCF_009758095.1_ASM975809v1_genomic.fna	Streptococcus equinus	98.1514
									GCF_022810625.1_ASM2281062v1_genomic.fna	Streptococcus equinus	98.1514
									GCF_014041875.1_ASM1404187v1_genomic.fna	Streptococcus equinus	98.1514
									GCF_013267515.1_ASM1326751v1_genomic.fna	Streptococcus intermedius	98.218
									GCF_000463355.1_ASM46335v1_genomic.fna	Streptococcus intermedius	98.218
									GCF_901553755.1_41851_D01_genomic.fna	Streptococcus porcinus	99.8612
									GCF_901553735.1_41965_D01_genomic.fna	Streptococcus porcinus	99.8612
									GCF_900475415.1_42206_H01_genomic.fna	Streptococcus porcinus	99.8612
									GCF_900475595.1_44343_G01_genomic.fna	Streptococcus uberis	99.0551
									GCF_002814135.1_ASM281413v1_genomic.fna	Streptococcus uberis	99.3168
									GCF_900475695.1_46463_C01_genomic.fna	Streptococcus uberis	99.3168
									GCF_000009545.1_ASM954v1_genomic.fna	Streptococcus uberis	99.3168
									GCF_001989555.1_ASM198955v1_genomic.fna	Enterococcus faecalis	98.7656
									GCF_029866805.1_ASM2986680v1_genomic.fna	Enterococcus faecalis	98.7656
									GCF_020882115.1_ASM2088211v1_genomic.fna	Enterococcus faecalis	98.7656
									GCF_028335345.1_ASM2833534v1_genomic.fna	Enterococcus faecalis	98.7656
									GCF_025263125.1_ASM2526312v1_genomic.fna	Enterococcus gallinarum	98.8838
									GCF_023375325.1_ASM2337532v1_genomic.fna	Enterococcus gallinarum	98.8838
									GCF_002078975.2_ASM207897v2_genomic.fna	Lactococcus lactis	98.5782
									GCF_017821195.2_ASM1782119v2_genomic.fna	Lactococcus lactis	98.5782
									GCF_029023865.1_ASM2902386v1_genomic.fna	Lactococcus lactis	98.5782
									GCF_022494905.1_ASM2249490v1_genomic.fna	Lactococcus lactis	98.5782
									GCF_017309505.1_ASM1730950v1_genomic.fna	Lactococcus garvieae	98.0068
									GCF_028993695.1_ASM2899369v1_genomic.fna	Lactococcus garvieae	98.0068
									GCF_021329025.1_ASM2132902v1_genomic.fna	Lactococcus garvieae	98.0068
									GCF_012220065.1_ASM1222006v1_genomic.fna	Lactococcus raffinolactis	99.0815
									GCF_010669245.1_ASM1066924v1_genomic.fna	Lactococcus raffinolactis	99.0815
									GCF_012219705.1_ASM1221970v1_genomic.fna	Lactococcus raffinolactis	99.0815
									GCF_017357905.1_ASM1735790v1_genomic.fna	Bacillus amyloliquefaciens	97.5608
									GCF_004421045.1_ASM442104v1_genomic.fna	Bacillus amyloliquefaciens	98.0742
									GCF_014792065.1_ASM1479206v1_genomic.fna	Bacillus amyloliquefaciens	98.0742
									GCF_000010165.1_ASM1016v1_genomic.fna	Brevibacillus brevis	96.9306
									GCF_030377165.1_ASM3037716v1_genomic.fna	Brevibacillus brevis	96.9306
									GCF_006349715.2_ASM634971v2_genomic.fna	Bacillus cereus	98.9683
									GCF_016774555.1_ASM1677455v1_genomic.fna	Bacillus cereus	98.9683
									GCF_025502485.1_ASM2550248v1_genomic.fna	Bacillus cereus	98.9683
									GCF_009739985.1_ASM973998v1_genomic.fna	Bacillus cereus	98.9683
									GCF_030518615.1_ASM3051861v1_genomic.fna	Bacillus cereus	98.9683
									GCF_003726095.1_ASM372609v1_genomic.fna	Niallia circulans	99.4494
									GCF_003726115.1_ASM372611v1_genomic.fna	Niallia circulans	99.4494
									GCF_023521655.1_ASM2352165v1_genomic.fna	Niallia circulans	99.4494
									GCF_021764685.1_ASM2176468v1_genomic.fna	Heyndrickxia coagulans	95.0695
									GCF_029339095.1_ASM2933909v1_genomic.fna	Heyndrickxia coagulans	95.0695
									GCF_023823815.1_ASM2382381v1_genomic.fna	Cytobacillus firmus	97.9148
									GCF_023657595.1_ASM2365759v1_genomic.fna	Cytobacillus firmus	98.5136
									GCF_030123345.1_ASM3012334v1_genomic.fna	Cytobacillus firmus	98.5136
									GCF_002173675.1_ASM217367v1_genomic.fna	Bacillus licheniformis	99.6509
									GCF_001726125.1_ASM172612v1_genomic.fna	Bacillus licheniformis	99.6509
									GCF_030284405.1_ASM3028440v1_genomic.fna	Bacillus licheniformis	99.6509
									GCF_002966955.1_ASM296695v1_genomic.fna	Bacillus licheniformis	99.6509
									GCF_001050455.1_ASM105045v1_genomic.fna	Priestia megaterium DSM 319	95.4482
									GCF_029537015.1_ASM2953701v1_genomic.fna	Priestia megaterium DSM 319	95.4482
									GCF_022630575.1_ASM2263057v1_genomic.fna	Bacillus mycoides	97.5169
									GCF_018742105.1_ASM1874210v1_genomic.fna	Bacillus mycoides	97.5169
									GCF_018736765.1_ASM1873676v1_genomic.fna	Bacillus mycoides	97.5169
									GCF_030122785.1_ASM3012278v1_genomic.fna	Paenibacillus polymyxa	98.8455
									GCF_002893885.1_ASM289388v1_genomic.fna	Paenibacillus polymyxa	98.8455
									GCF_000597985.1_ASM59798v1_genomic.fna	Paenibacillus polymyxa	98.8455
									GCF_024584565.1_ASM2458456v1_genomic.fna	Paenibacillus polymyxa	98.8455
									GCF_019710455.1_ASM1971045v1_genomic.fna	Bacillus pumilus	99.0613
									GCF_029634685.1_ASM2963468v1_genomic.fna	Bacillus pumilus	99.0613
									GCF_020520205.1_ASM2052020v1_genomic.fna	Bacillus pumilus	99.0613
									GCF_029952785.1_ASM2995278v1_genomic.fna	Lysinibacillus sphaericus	99.4569
									GCF_001629735.1_ASM162973v1_genomic.fna	Lysinibacillus sphaericus	99.4569
									GCF_002300135.1_ASM230013v1_genomic.fna	Geobacillus stearothermophilus	96.9978
									GCF_030376805.1_ASM3037680v1_genomic.fna	Geobacillus stearothermophilus	97.1578
									GCF_030376785.1_ASM3037678v1_genomic.fna	Geobacillus stearothermophilus	97.1578
									GCF_030376845.1_ASM3037684v1_genomic.fna	Geobacillus stearothermophilus	97.1578
									GCF_029536935.1_ASM2953693v1_genomic.fna	Bacillus subtilis	98.602
									GCF_014879275.1_ASM1487927v1_genomic.fna	Bacillus subtilis	98.602
									GCF_021172185.1_ASM2117218v1_genomic.fna	Bacillus subtilis	98.602
									GCF_030028395.1_ASM3002839v1_genomic.fna	Bacillus subtilis	99.0634
									GCF_027497435.1_ASM2749743v1_genomic.fna	Bacillus subtilis	99.0634
									GCF_024509915.1_ASM2450991v1_genomic.fna	Parageobacillus thermoglucosidasius	98.7085
									GCF_001295365.1_ASM129536v1_genomic.fna	Parageobacillus thermoglucosidasius	98.7085
									GCF_009224065.1_ASM922406v1_genomic.fna	Bacillus thuringiensis	98.1058
									GCF_005155285.1_ASM515528v1_genomic.fna	Bacillus thuringiensis	98.1058
									GCF_001685565.1_ASM168556v1_genomic.fna	Bacillus thuringiensis	98.1058
									GCF_021595545.1_ASM2159554v1_genomic.fna	Bacillus thuringiensis	98.1058
									GCF_002173495.1_ASM217349v1_genomic.fna	Bacillus atrophaeus	98.8238
									GCF_019443725.1_ASM1944372v1_genomic.fna	Bacillus atrophaeus	98.8613
									GCF_029581095.1_ASM2958109v1_genomic.fna	Bacillus atrophaeus	98.8613
									GCF_029541525.1_ASM2954152v1_genomic.fna	Bacillus atrophaeus	98.8613
									GCF_000165925.1_ASM16592v1_genomic.fna	Bacillus atrophaeus	98.8613
									GCF_002003265.1_ASM200326v1_genomic.fna	Paenibacillus larvae subsp. pulvifaciens	99.5537
									GCF_002951915.1_ASM295191v1_genomic.fna	Paenibacillus larvae subsp. pulvifaciens	99.5537
									GCF_002082155.1_ASM208215v1_genomic.fna	Paenibacillus larvae subsp. pulvifaciens	99.5537
									GCF_011220525.1_PaenibacERICV_HGAP3_2SC_genomic.fna	Paenibacillus larvae subsp. pulvifaciens	99.5537
									GCF_003663745.1_ASM366374v1_genomic.fna	Brevibacillus laterosporus	98.6641
									GCF_002865525.1_ASM286552v1_genomic.fna	Brevibacillus laterosporus	98.6641
									GCF_000219535.2_ASM21953v3_genomic.fna	Brevibacillus laterosporus	98.6641
									GCF_030123325.1_ASM3012332v1_genomic.fna	Peribacillus simplex	95.8316
									GCF_030123485.1_ASM3012348v1_genomic.fna	Peribacillus simplex	95.8316
									GCF_001878675.1_ASM187867v1_genomic.fna	Virgibacillus halodenitrificans	98.1675
									GCF_030122745.1_ASM3012274v1_genomic.fna	Virgibacillus halodenitrificans	98.1675
									GCF_022984115.1_ASM2298411v1_genomic.fna	Paraclostridium bifermentans	97.0464
									GCF_019916025.1_ASM1991602v1_genomic.fna	Paraclostridium bifermentans	97.0464
									GCF_002866045.1_ASM286604v1_genomic.fna	Clostridium botulinum	98.4823
									GCF_000019545.1_ASM1954v1_genomic.fna	Clostridium botulinum	98.4823
									GCF_000020345.1_ASM2034v1_genomic.fna	Clostridium botulinum	98.4823
									GCF_000022765.1_ASM2276v1_genomic.fna	Clostridium botulinum	99.0965
									GCF_001889365.1_ASM188936v1_genomic.fna	Clostridium botulinum	99.0965
									GCF_001456065.2_ASM145606v2_genomic.fna	Clostridium butyricum	98.7494
									GCF_009650315.1_ASM965031v1_genomic.fna	Clostridium butyricum	98.7494
									GCF_015351935.2_ASM1535193v2_genomic.fna	Clostridioides difficile	99.3803
									GCF_003482065.1_ASM348206v1_genomic.fna	Clostridioides difficile	99.3803
									GCF_001856645.1_ASM185664v1_genomic.fna	Clostridium pasteurianum	99.2891
									GCF_026410065.1_ASM2641006v1_genomic.fna	Clostridium pasteurianum	99.2891
									GCF_020138615.1_ASM2013861v1_genomic.fna	Clostridium perfringens	96.8612
									GCF_024599935.1_ASM2459993v1_genomic.fna	Clostridium perfringens	98.5052
									GCF_029393235.1_ASM2939323v1_genomic.fna	Clostridium perfringens	98.8518
									GCF_020138435.1_ASM2013843v1_genomic.fna	Clostridium perfringens	98.8518
									GCF_020138475.1_ASM2013847v1_genomic.fna	Clostridium perfringens	98.8518
									GCF_002865995.1_ASM286599v1_genomic.fna	Paeniclostridium sordellii	96.9086
									GCF_019434215.1_ASM1943421v1_genomic.fna	Paeniclostridium sordellii	96.9086
									GCF_002865785.1_ASM286578v1_genomic.fna	Clostridium sporogenes	97.057
									GCF_020099295.1_ASM2009929v1_genomic.fna	Clostridium sporogenes	99.1609
									GCF_021495975.1_ASM2149597v1_genomic.fna	Clostridium sporogenes	99.1609
									GCF_007833475.1_ASM783347v1_genomic.fna	Clostridium sporogenes	99.1609
									GCF_026240815.1_ASM2624081v1_genomic.fna	Thermoclostridium stercorarium	99.635
									GCF_001697245.1_ASM169724v1_genomic.fna	Thermoclostridium stercorarium	99.8187
									GCF_001697285.1_ASM169728v1_genomic.fna	Thermoclostridium stercorarium	99.8187
									GCF_000331995.1_ASM33199v1_genomic.fna	Thermoclostridium stercorarium	99.8187
									GCF_000007625.1_ASM762v1_genomic.fna	Clostridium tetani	99.0305
									GCF_003013635.1_ASM301363v1_genomic.fna	Clostridium tetani	99.0305
									GCF_025213355.1_ASM2521335v1_genomic.fna	Acetivibrio thermocellus	99.6731
									GCF_001692755.1_ASM169275v1_genomic.fna	Acetivibrio thermocellus	99.6731
									GCF_000328545.1_ASM32854v1_genomic.fna	Thermoanaerobacterium thermosaccharolyticum DSM 571	96.9925
									GCF_000145615.1_ASM14561v1_genomic.fna	Thermoanaerobacterium thermosaccharolyticum DSM 571	96.9925
									GCF_002003345.1_ASM200334v1_genomic.fna	Clostridium beijerinckii	97.6877
									GCF_018140595.1_ASM1814059v1_genomic.fna	Clostridium beijerinckii	98.1604
									GCF_021729445.1_ASM2172944v1_genomic.fna	Clostridium beijerinckii	98.1604
									GCF_000833105.2_ASM83310v2_genomic.fna	Clostridium beijerinckii	98.1604
									GCF_025962575.1_ASM2596257v1_genomic.fna	Clostridium beijerinckii	98.1604
									GCF_012271835.1_ASM1227183v1_genomic.fna	[Clostridium] innocuum	99.2702
									GCF_022845735.1_ASM2284573v1_genomic.fna	[Clostridium] innocuum	99.2702
									GCF_023008265.1_ASM2300826v1_genomic.fna	[Clostridium] innocuum	99.2702
									GCF_006228565.1_ASM622856v1_genomic.fna	Moorella thermoacetica	98.6095
									GCF_001874605.1_ASM187460v1_genomic.fna	Moorella thermoacetica	98.6095
									GCF_001729945.1_ASM172994v1_genomic.fna	Moorella thermoacetica	98.6095
									GCF_001902295.1_ASM190229v1_genomic.fna	Clostridium kluyveri	95.0907
									GCF_000016505.1_ASM1650v1_genomic.fna	Clostridium kluyveri	95.0907
									GCF_020097255.1_ASM2009725v1_genomic.fna	Thomasclavelia ramosa	99.584
									GCF_016728785.1_ASM1672878v1_genomic.fna	Thomasclavelia ramosa	99.584
									GCF_014131695.1_ASM1413169v1_genomic.fna	Thomasclavelia ramosa	99.584
									GCF_000789395.1_ASM78939v1_genomic.fna	Clostridium baratii	96.2778
									GCF_001991075.2_ASM199107v2_genomic.fna	Clostridium baratii	96.2778
									GCF_000014465.1_ASM1446v1_genomic.fna	Levilactobacillus brevis	99.2028
									GCF_002173555.1_ASM217355v1_genomic.fna	Levilactobacillus brevis	99.2028
									GCF_008369805.1_ASM836980v1_genomic.fna	Lentilactobacillus buchneri	99.7565
									GCF_018314255.1_ASM1831425v1_genomic.fna	Lentilactobacillus buchneri	99.7565
									GCF_000298115.2_ASM29811v2_genomic.fna	Lentilactobacillus buchneri	99.7565
									GCF_000211375.1_ASM21137v1_genomic.fna	Lentilactobacillus buchneri	99.7565
									GCF_025960385.1_ASM2596038v1_genomic.fna	Weissella confusa	97.8751
									GCF_019576155.1_ASM1957615v1_genomic.fna	Weissella confusa	98.1726
									GCF_004771075.1_ASM477107v1_genomic.fna	Weissella confusa	98.1726
									GCF_001888965.1_ASM188896v1_genomic.fna	Lactobacillus delbrueckii subsp. bulgaricus	97.4024
									GCF_006704185.1_ASM670418v1_genomic.fna	Lactobacillus delbrueckii subsp. bulgaricus	97.4024
									GCF_001702095.1_ASM170209v1_genomic.fna	Lactobacillus helveticus	98.8299
									GCF_002849935.1_ASM284993v1_genomic.fna	Lactobacillus helveticus	98.8299
									GCF_023823145.1_ASM2382314v1_genomic.fna	Lactiplantibacillus pentosus	98.0308
									GCF_003627295.1_ASM362729v1_genomic.fna	Lactiplantibacillus pentosus	98.0308
									GCF_002211885.1_ASM221188v1_genomic.fna	Lactiplantibacillus pentosus	98.0308
									GCF_002850015.1_ASM285001v1_genomic.fna	Lactiplantibacillus pentosus	98.0308
									GCF_025398935.1_ASM2539893v1_genomic.fna	Lactiplantibacillus pentosus	98.0308
									GCF_013155145.1_ASM1315514v1_genomic.fna	Lactiplantibacillus plantarum	99.3644
									GCF_001990145.1_ASM199014v1_genomic.fna	Lactiplantibacillus plantarum	99.3644
									GCF_021279005.2_ASM2127900v2_genomic.fna	Lactiplantibacillus plantarum	99.3644
									GCF_020995385.1_ASM2099538v1_genomic.fna	Lactobacillus gasseri	98.4413
									GCF_002158885.1_ASM215888v1_genomic.fna	Lactobacillus gasseri	100
									GCF_017498665.1_ASM1749866v1_genomic.fna	Lactobacillus gasseri	100
									GCF_017840575.1_ASM1784057v1_genomic.fna	Lactobacillus gasseri	100
									GCF_902386655.1_UHGG_MGYG-HGUT-02387_genomic.fna	Lactobacillus gasseri	100
									GCF_025252385.1_ASM2525238v1_genomic.fna	Lacticaseibacillus paracasei	98.8388
									GCF_016757695.1_ASM1675769v1_genomic.fna	Lacticaseibacillus paracasei	98.8388
									GCF_006874665.1_ASM687466v1_genomic.fna	Limosilactobacillus reuteri	98.6537
									GCF_030517815.1_ASM3051781v1_genomic.fna	Limosilactobacillus reuteri	98.6537
									GCF_023734275.1_ASM2373427v1_genomic.fna	Latilactobacillus sakei	97.4176
									GCF_003627275.1_ASM362727v1_genomic.fna	Latilactobacillus sakei	99.3245
									GCF_003288235.1_ASM328823v1_genomic.fna	Latilactobacillus sakei	99.3245
									GCF_009738535.1_ASM973853v1_genomic.fna	Lactobacillus acetotolerans	98.1098
									GCF_001042405.1_ASM104240v1_genomic.fna	Lactobacillus acetotolerans	98.5478
									GCF_012848655.1_ASM1284865v1_genomic.fna	Lactobacillus acetotolerans	98.9511
									GCF_008831485.1_ASM883148v1_genomic.fna	Lactobacillus acetotolerans	98.9511
									GCF_025311455.1_ASM2531145v1_genomic.fna	Ligilactobacillus agilis	97.3866
									GCF_002240375.2_ASM224037v2_genomic.fna	Ligilactobacillus agilis	97.3866
									GCF_023523445.1_ASM2352344v1_genomic.fna	Lactobacillus amylovorus	97.5961
									GCF_026184355.1_ASM2618435v1_genomic.fna	Lactobacillus amylovorus	97.832
									GCF_002706375.1_ASM270637v1_genomic.fna	Lactobacillus amylovorus	97.832
									GCF_002706745.1_ASM270674v1_genomic.fna	Companilactobacillus farciminis	96.7095
									GCF_028335385.1_ASM2833538v1_genomic.fna	Companilactobacillus farciminis	96.7095
									GCF_003346795.1_ASM334679v1_genomic.fna	Limosilactobacillus fermentum	99.1547
									GCF_011032745.1_ASM1103274v1_genomic.fna	Limosilactobacillus fermentum	99.1547
									GCF_003255875.1_ASM325587v1_genomic.fna	Limosilactobacillus fermentum	99.1547
									GCF_000364205.2_ASM36420v2_genomic.fna	Ligilactobacillus murinus	97.8669
									GCF_003288135.1_ASM328813v1_genomic.fna	Ligilactobacillus murinus	97.8669
									GCF_028622795.1_ASM2862279v1_genomic.fna	Ligilactobacillus ruminis	98.7427
									GCF_025150895.1_ASM2515089v1_genomic.fna	Ligilactobacillus ruminis	98.7427
									GCF_030438415.1_ASM3043841v1_genomic.fna	Ligilactobacillus ruminis	98.7427
									GCF_000008925.1_ASM892v1_genomic.fna	Ligilactobacillus salivarius	98.567
									GCF_001011095.1_ASM101109v1_genomic.fna	Ligilactobacillus salivarius	98.567
									GCF_000143435.1_ASM14343v1_genomic.fna	Ligilactobacillus salivarius	98.567
									GCF_030062785.1_ASM3006278v1_genomic.fna	Ligilactobacillus salivarius	98.567
									GCF_023573545.1_ASM2357354v1_genomic.fna	Ligilactobacillus salivarius	98.567
									GCF_000225325.1_ASM22532v1_genomic.fna	Fructilactobacillus sanfranciscensis	98.9818
									GCF_029023685.1_ASM2902368v1_genomic.fna	Fructilactobacillus sanfranciscensis	98.9832
									GCF_009496975.1_ASM949697v1_genomic.fna	Fructilactobacillus sanfranciscensis	98.9832
									GCF_014789145.1_ASM1478914v1_genomic.fna	Weissella viridescens	98.7384
									GCF_030323345.1_ASM3032334v1_genomic.fna	Weissella viridescens	98.7384
									GCF_025311495.1_ASM2531149v1_genomic.fna	Limosilactobacillus oris	97.0694
									GCF_030053195.1_ASM3005319v1_genomic.fna	Limosilactobacillus oris	97.0694
									GCF_000438605.1_ASM43860v1_genomic.fna	Listeria monocytogenes	98.6583
									GCF_018604285.1_ASM1860428v1_genomic.fna	Listeria monocytogenes	98.6583
									GCF_002285835.1_ASM228583v1_genomic.fna	Listeria monocytogenes	99.8433
									GCF_001908335.2_ASM190833v2_genomic.fna	Listeria monocytogenes	99.8433
									GCF_000027145.1_ASM2714v1_genomic.fna	Listeria seeligeri	97.8833
									GCF_015697685.1_ASM1569768v1_genomic.fna	Listeria seeligeri	97.8833
									GCF_017363655.2_ASM1736365v2_genomic.fna	Listeria innocua	98.9367
									GCF_024800705.1_ASM2480070v1_genomic.fna	Listeria innocua	98.9367
									GCF_004636745.1_ASM463674v2_genomic.fna	Listeria innocua	98.9367
									GCF_900637845.1_52683_D03_genomic.fna	Erysipelothrix rhusiopathiae	99.251
									GCF_003722215.1_ASM372221v1_genomic.fna	Erysipelothrix rhusiopathiae	99.251
									GCF_007725185.1_ASM772518v1_genomic.fna	Erysipelothrix rhusiopathiae	99.251
									GCF_023650665.1_ASM2365066v1_genomic.fna	Erysipelothrix rhusiopathiae	99.251
									GCF_023170065.1_ASM2317006v1_genomic.fna	Actinomyces naeslundii	98.5132
									GCF_016127855.1_ASM1612785v1_genomic.fna	Actinomyces naeslundii	98.5132
									GCF_003856735.1_ASM385673v1_genomic.fna	Bifidobacterium adolescentis	97.8792
									GCF_003030905.1_ASM303090v1_genomic.fna	Bifidobacterium adolescentis	97.8792
									GCF_002845845.1_ASM284584v1_genomic.fna	Bifidobacterium bifidum	98.7193
									GCF_902386775.1_UHGG_MGYG-HGUT-02396_genomic.fna	Bifidobacterium bifidum	98.7193
									GCF_001025155.1_ASM102515v1_genomic.fna	Bifidobacterium angulatum	98.5076
									GCF_000966445.2_ASM96644v2_genomic.fna	Bifidobacterium angulatum	98.5076
									GCF_902387425.1_UHGG_MGYG-HGUT-02469_genomic.fna	Bifidobacterium breve	98.825
									GCF_002838645.1_ASM283864v1_genomic.fna	Bifidobacterium breve	98.825
									GCF_001042615.1_ASM104261v1_genomic.fna	Bifidobacterium catenulatum	98.3702
									GCF_902381755.1_UHGG_MGYG-HGUT-01490_genomic.fna	Bifidobacterium catenulatum	100
									GCF_009684555.1_ASM968455v1_genomic.fna	Bifidobacterium catenulatum	100
									GCF_001025195.1_ASM102519v1_genomic.fna	Bifidobacterium catenulatum	100
									GCF_030250365.2_ASM3025036v2_genomic.fna	Bifidobacterium catenulatum	100
									GCF_000024445.1_ASM2444v1_genomic.fna	Bifidobacterium dentium	98.6027
									GCF_017743215.1_ASM1774321v1_genomic.fna	Bifidobacterium dentium	98.8512
									GCF_017743195.1_ASM1774319v1_genomic.fna	Bifidobacterium dentium	98.8512
									GCF_020309985.1_ASM2030998v1_genomic.fna	Bifidobacterium pseudolongum	99.8579
									GCF_020309965.1_ASM2030996v1_genomic.fna	Bifidobacterium pseudolongum	99.8667
									GCF_020309925.1_ASM2030992v1_genomic.fna	Bifidobacterium pseudolongum	99.8667
									GCF_002706665.1_ASM270666v1_genomic.fna	Bifidobacterium pseudolongum	99.8667
									GCF_002024345.1_ASM202434v1_genomic.fna	Corynebacterium stationis	98.2841
									GCF_001941345.1_ASM194134v1_genomic.fna	Corynebacterium stationis	98.2841
									GCF_018128265.1_ASM1812826v1_genomic.fna	Cellulosimicrobium cellulans	97.8195
									GCF_007362135.1_ASM736213v1_genomic.fna	Cellulosimicrobium cellulans	97.8195
									GCF_002073375.2_ASM207337v2_genomic.fna	Corynebacterium diphtheriae	98.0122
									GCF_000241915.1_ASM24191v1_genomic.fna	Corynebacterium diphtheriae	98.0122
									GCF_007431185.1_ASM743118v1_genomic.fna	Corynebacterium glutamicum	98.9631
									GCF_000828015.1_ASM82801v1_genomic.fna	Corynebacterium glutamicum	98.9631
									GCF_000404145.1_ASM40414v1_genomic.fna	Corynebacterium glutamicum	98.9631
									GCF_000742715.1_ASM74271v1_genomic.fna	Corynebacterium glutamicum	98.9631
									GCF_001682275.1_ASM168227v1_genomic.fna	Corynebacterium pseudotuberculosis	98.6362
									GCF_001579925.1_ASM157992v1_genomic.fna	Corynebacterium pseudotuberculosis	98.6362
									GCF_900478035.1_47555_E02_genomic.fna	Corynebacterium renale	98.0748
									GCF_900475655.1_45076_A02_genomic.fna	Corynebacterium renale	98.0748
									GCF_003641245.1_ASM364124v1_genomic.fna	Corynebacterium xerosis	96.047
									GCF_009730475.1_ASM973047v1_genomic.fna	Corynebacterium xerosis	96.047
									GCF_900683775.1_ASM90068377v1_genomic.fna	Eubacterium limosum	97.932
									GCF_000807675.2_ASM80767v2_genomic.fna	Eubacterium limosum	97.932
									GCF_900087025.1_PFRJS2_genomic.fna	Propionibacterium freudenreichii	98.9682
									GCF_900087655.1_PFRJS14_genomic.fna	Propionibacterium freudenreichii	98.9837
									GCF_029747785.1_ASM2974778v1_genomic.fna	Propionibacterium freudenreichii	98.9837
									GCF_029952765.1_ASM2995276v1_genomic.fna	Propionibacterium freudenreichii	98.9837
									GCF_003330925.1_ASM333092v1_genomic.fna	Propionibacterium freudenreichii	98.9837
									GCF_000240035.1_ASM24003v1_genomic.fna	Cutibacterium acnes	99.4266
									GCF_030166635.1_ASM3016663v1_genomic.fna	Cutibacterium acnes	99.8446
									GCF_020181495.1_ASM2018149v1_genomic.fna	Cutibacterium acnes	99.8446
									GCF_029851525.1_ASM2985152v1_genomic.fna	Cutibacterium acnes	99.8446
									GCF_004011055.1_ASM401105v1_genomic.fna	Acidipropionibacterium jensenii	97.7742
									GCF_004011075.1_ASM401107v1_genomic.fna	Acidipropionibacterium jensenii	97.7742
									GCF_027570695.1_ASM2757069v1_genomic.fna	Mycolicibacterium fortuitum	98.666
									GCF_022179545.1_ASM2217954v1_genomic.fna	Mycolicibacterium fortuitum	98.6901
									GCF_001307545.1_ASM130754v1_genomic.fna	Mycolicibacterium fortuitum	98.6901
									GCF_016756195.1_ASM1675619v1_genomic.fna	Mycobacterium intracellulare	99.7668
									GCF_021183745.1_ASM2118374v1_genomic.fna	Mycobacterium intracellulare	99.7668
									GCF_016756155.1_ASM1675615v1_genomic.fna	Mycobacterium intracellulare	99.7668
									GCF_022370395.1_ASM2237039v1_genomic.fna	Mycolicibacterium smegmatis	99.1257
									GCF_000331165.2_ASM33116v2_genomic.fna	Mycolicibacterium smegmatis	99.1257
									GCF_001457595.1_NCTC8159_genomic.fna	Mycolicibacterium smegmatis	99.1257
									GCF_022370415.1_ASM2237041v1_genomic.fna	Mycolicibacterium smegmatis	99.1257
									GCF_017901095.1_ASM1790109v1_genomic.fna	Mycobacterium tuberculosis	99.8748
									GCF_021559895.1_ASM2155989v1_genomic.fna	Mycobacterium tuberculosis	99.8748
									GCF_000018345.1_ASM1834v1_genomic.fna	Mycobacterium marinum M	98.4087
									GCF_000723425.2_E11_genomic.fna	Mycobacterium marinum M	98.4087
									GCF_019739075.1_ASM1973907v1_genomic.fna	Mycolicibacterium farcinogenes	98.4805
									GCF_019739095.1_ASM1973909v1_genomic.fna	Mycolicibacterium farcinogenes	98.4805
									GCF_020150655.1_ASM2015065v1_genomic.fna	Mycobacterium ulcerans	99.1901
									GCF_000013925.1_ASM1392v2_genomic.fna	Mycobacterium ulcerans	99.7688
									GCF_002355775.1_ASM235577v1_genomic.fna	Mycobacterium ulcerans	99.7688
									GCF_020616615.1_ASM2061661v1_genomic.fna	Mycobacterium ulcerans	99.7688
									GCF_001620305.1_ASM162030v1_genomic.fna	Rhodococcus fascians	97.6283
									GCF_001620005.1_ASM162000v1_genomic.fna	Rhodococcus fascians	97.6283
									GCF_003586525.1_ASM358652v1_genomic.fna	Rhodococcus ruber	99.098
									GCF_003086595.1_ASM308659v1_genomic.fna	Rhodococcus ruber	99.098
									GCF_000696675.2_ASM69667v2_genomic.fna	Rhodococcus erythropolis	98.7506
									GCF_008728655.1_ASM872865v1_genomic.fna	Rhodococcus erythropolis	98.7506
									GCF_017068035.1_ASM1706803v1_genomic.fna	Rhodococcus erythropolis	98.7506
									GCF_011611865.1_ASM1161186v1_genomic.fna	Rhodococcus erythropolis	98.7506
									GCF_000454045.1_ASM45404v1_genomic.fna	Rhodococcus erythropolis	98.7506
									GCF_947311705.1_CCOS_2040.3_genomic.fna	Streptomyces albidoflavus	99.0802
									GCF_015601545.1_ASM1560154v1_genomic.fna	Streptomyces albidoflavus	99.0802
									GCF_030345275.1_ASM3034527v1_genomic.fna	Streptomyces albidoflavus	99.0802
									GCF_001577385.1_ASM157738v1_genomic.fna	Streptomyces albidoflavus	99.0802
									GCF_013693715.1_ASM1369371v1_genomic.fna	Streptomyces albidoflavus	99.0802
									GCF_001632865.1_ASM163286v1_genomic.fna	Streptomyces ambofaciens	99.2288
									GCF_001267885.1_ASM126788v1_genomic.fna	Streptomyces ambofaciens	99.2288
									GCF_020783455.1_ASM2078345v1_genomic.fna	Streptomyces anulatus	96.1009
									GCF_019378935.1_ASM1937893v1_genomic.fna	Streptomyces anulatus	96.1009
									GCF_023376055.1_ASM2337605v1_genomic.fna	Streptomyces fradiae	99.4147
									GCF_008704425.1_ASM870442v1_genomic.fna	Streptomyces fradiae	99.4147
									GCF_000261345.2_ASM26134v2_genomic.fna	Streptomyces globisporus	96.4827
									GCF_003147545.1_ASM314754v1_genomic.fna	Streptomyces globisporus	96.4827
									GCF_021496255.1_ASM2149625v1_genomic.fna	Salmonella enterica	98.4818
									GCF_019339425.1_ASM1933942v1_genomic.fna	Salmonella enterica	98.4818
									GCF_024364905.1_ASM2436490v1_genomic.fna	Salmonella enterica	98.4818
									GCF_003957805.1_ASM395780v1_genomic.fna	Synechococcus elongatus PCC 6301	98.5738
									GCF_000010065.1_ASM1006v1_genomic.fna	Synechococcus elongatus PCC 6301	98.5738
									GCF_029854965.1_ASM2985496v1_genomic.fna	Pseudomonas amygdali pv. aesculi	98.3874
									GCF_023207855.1_ASM2320785v1_genomic.fna	Pseudomonas amygdali pv. aesculi	98.3874
									GCF_022701235.1_ASM2270123v1_genomic.fna	Bifidobacterium longum	96.5345
									GCF_016838685.1_ASM1683868v1_genomic.fna	Bifidobacterium longum	98.4385
									GCF_000166315.1_ASM16631v1_genomic.fna	Bifidobacterium longum	98.4385
									GCF_001877035.1_ASM187703v1_genomic.fna	Clostridium estertheticum subsp. estertheticum	99.8488
									GCF_027594565.1_ASM2759456v1_genomic.fna	Clostridium estertheticum subsp. estertheticum	99.8488
									GCF_026650905.1_ASM2665090v1_genomic.fna	Clostridium estertheticum subsp. estertheticum	99.8488
									GCF_026650965.1_ASM2665096v1_genomic.fna	Clostridium estertheticum subsp. estertheticum	99.8488
									GCF_026651045.1_ASM2665104v1_genomic.fna	Clostridium estertheticum subsp. estertheticum	99.8488
									GCF_030252405.1_ASM3025240v1_genomic.fna	Pseudomonas syringae pv. tomato	98.9044
									GCF_000007805.1_ASM780v1_genomic.fna	Pseudomonas syringae pv. tomato	98.9044
									GCF_016599655.1_ASM1659965v1_genomic.fna	Pseudomonas syringae pv. tomato	98.9044
									GCF_002966555.1_ASM296655v1_genomic.fna	Pseudomonas syringae pv. tomato	98.9044
									GCF_000021085.1_ASM2108v1_genomic.fna	Buchnera aphidicola str. 5A (Acyrthosiphon pisum)	0
									GCF_016406325.1_ASM1640632v1_genomic.fna	Shewanella putrefaciens	0
									GCF_000512145.1_ASM51214v2_genomic.fna	Borrelia parkeri HR1	0
									GCF_023035415.1_ASM2303541v1_genomic.fna	Borrelia turicatae	0
									GCF_017751225.1_ASM1775122v1_genomic.fna	Brachyspira hyodysenteriae	0
									GCF_002220735.1_ASM222073v1_genomic.fna	Campylobacter sputorum bv. faecalis CCUG 20703	0
									GCF_000739375.1_ASM73937v1_genomic.fna	Comamonas testosteroni TK102	0
									GCF_002865505.1_ASM286550v1_genomic.fna	Pseudomonas fluorescens	0
									GCF_000297075.2_Ppseudo_final_genomic.fna	Pseudomonas oleovorans CECT 5344	0
									GCF_000988485.1_ASM98848v1_genomic.fna	Pseudomonas syringae pv. syringae B301D	0
									GCF_028750015.1_ASM2875001v1_genomic.fna	Xanthomonas campestris pv. campestris	0
									GCF_001929085.2_ASM192908v2_genomic.fna	Xanthomonas oryzae pv. oryzae	0
									GCF_017584205.1_ASM1758420v1_genomic.fna	Agrobacterium rhizogenes	0
									GCF_001676765.1_ASM167676v1_genomic.fna	Mesorhizobium loti NZP2037	0
									GCF_002202135.1_ASM220213v1_genomic.fna	Acetobacter pasteurianus subsp. pasteurianus	0
									GCF_019930685.1_ASM1993068v1_genomic.fna	Legionella longbeachae	0
									GCF_000953635.1_LMI_genomic.fna	Legionella micdadei	0
									GCF_901482445.1_45076_H02_genomic.fna	Neisseria lactamica	0
									GCF_000800235.1_ASM80023v1_genomic.fna	Neisseria meningitidis	0
									GCF_004008095.1_ASM400809v1_genomic.fna	Bordetella bronchiseptica	0
									GCF_000024245.1_ASM2424v1_genomic.fna	Zymomonas mobilis subsp. mobilis NCIMB 11163	0
									GCF_011465095.1_ASM1146509v1_genomic.fna	Morganella morganii subsp. morganii	0
									GCF_030011615.1_ASM3001161v1_genomic.fna	Aeromonas salmonicida	0
									GCF_015508545.1_ASM1550854v2_genomic.fna	Aeromonas caviae	0
									GCF_026651485.1_ASM2665148v1_genomic.fna	Aeromonas jandaei	0
									GCF_016026615.1_ASM1602661v1_genomic.fna	Aeromonas allosaccharophila	0
									GCF_015168795.1_ASM1516879v1_genomic.fna	Vibrio cholerae	0
									GCF_028898645.1_ASM2889864v1_genomic.fna	Vibrio harveyi	0
									GCF_029774115.1_ASM2977411v1_genomic.fna	Actinobacillus equuli subsp. haemolyticus	0
									GCF_014931375.1_ASM1493137v1_genomic.fna	Haemophilus parainfluenzae	0
									GCF_016455325.1_ASM1645532v1_genomic.fna	Histophilus somni	0
									GCF_002777395.1_ASM277739v1_genomic.fna	Glaesserella parasuis D74	0
									GCF_019134675.1_ASM1913467v1_genomic.fna	Pasteurella multocida	0
									GCF_000018745.1_ASM1874v1_genomic.fna	Coxiella burnetii RSA 331	0
									GCF_009936175.1_ASM993617v1_genomic.fna	Bartonella quintana	0
									GCF_018289375.1_ASM1828937v1_genomic.fna	Bacteroides uniformis	0
									GCF_002754135.1_ASM275413v1_genomic.fna	Porphyromonas gingivalis	0
									GCF_000025925.1_ASM2592v1_genomic.fna	Prevotella ruminicola 23	0
									GCF_027947635.1_ASM2794763v1_genomic.fna	Desulfovibrio vulgaris	0
									GCF_000691605.1_ASM69160v1_genomic.fna	Bdellovibrio bacteriovorus	0
									GCF_002872415.1_ASM287241v1_genomic.fna	Bacteriovorax stolpii	0
									GCF_000143225.1_ASM14322v1_genomic.fna	Herbaspirillum seropedicae SmR1	0
									GCF_014844335.1_ASM1484433v1_genomic.fna	Flavobacterium columnare	0
									GCF_014622665.1_ASM1462266v1_genomic.fna	Rhodobacter capsulatus	0
									GCF_013267535.1_ASM1326753v1_genomic.fna	Finegoldia magna	0
									GCF_025558305.1_ASM2555830v1_genomic.fna	Staphylococcus schleiferi	0
									GCF_029011235.1_ASM2901123v1_genomic.fna	Streptococcus anginosus	0
									GCF_030020365.1_ASM3002036v1_genomic.fna	Streptococcus iniae	0
									GCF_025201235.1_ASM2520123v1_genomic.fna	Streptococcus parauberis	0
									GCF_017897965.1_ASM1789796v1_genomic.fna	Enterococcus faecium	0
									GCF_013391145.1_ASM1339114v1_genomic.fna	Enterococcus hirae	0
									GCF_000468955.1_ASM46895v1_genomic.fna	Lactococcus cremoris subsp. cremoris KW2	0
									GCF_003410255.1_ASM341025v1_genomic.fna	Bacillus anthracis	0
									GCF_000724485.1_ASM72448v1_genomic.fna	Bacillus methanolicus MGA3	0
									GCF_003606265.1_ASM360626v1_genomic.fna	Clostridium septicum	0
									GCF_024397395.1_ASM2439739v1_genomic.fna	Lactobacillus acidophilus	0
									GCF_002192215.1_ASM219221v1_genomic.fna	Lacticaseibacillus casei	0
									GCF_011765585.1_ASM1176558v1_genomic.fna	Lentilactobacillus hilgardii	0
									GCF_030438335.1_ASM3043833v1_genomic.fna	Ligilactobacillus animalis	0
									GCF_007954685.1_ASM795468v1_genomic.fna	Loigolactobacillus coryniformis	0
									GCF_025677785.1_ASM2567778v1_genomic.fna	Limosilactobacillus vaginalis	0
									GCF_003971465.1_ASM397146v1_genomic.fna	Trueperella pyogenes	0
									GCF_005890155.1_ASM589015v1_genomic.fna	Acidipropionibacterium acidipropionici	0
									GCF_900638645.1_58635_A02_genomic.fna	Arachnia propionica	0
									GCF_004345205.2_ASM434520v2_genomic.fna	Mycobacterium avium subsp. hominissuis	0
									GCF_029025245.1_ASM2902524v1_genomic.fna	Mycobacteroides chelonae	0
									GCF_900187265.1_52295_G01_genomic.fna	Rhodococcus rhodochrous	0
									GCF_011006355.1_ASM1100635v1_genomic.fna	Streptomyces albus	0
									GCF_003851865.1_ASM385186v1_genomic.fna	Pseudomonas chlororaphis subsp. aureofaciens	0
